# Supplementary material for: Design and synthesis of Meldrum's acid based 7-azaindole anchored 1,2,3-triazole hybrids as anticancer agents
Source: Royal Society of Chemistry journal article supplement (doi:10.1039/d4md00015c), 2024-01-01
Supplement: d4md00015c1.pdf [file d4md00015c1.pdf]

**Design and Synthesis of Meldrum's acid Based 7-Azaindole Anchored 1,2,3-Triazole  
Hybrids as Anticancer Agents**

Murali Krishna Vanga,<sup>a</sup> Rambabu Bhukya,<sup>a</sup> Vishnu Thumma,<sup>b</sup> S.S.S.S Sudha Ambadipudi,<sup>c</sup> V.  
Lakshma Nayak,<sup>c</sup> Andugulapati Sai Balaji,<sup>c\*</sup> Vijjulatha Manga<sup>a,d\*</sup>

<sup>a</sup>Department of Chemistry, Osmania University, Hyderabad-500007, Telangana, India

<sup>b</sup>Department of Sciences and Humanities, Matrusri Engineering College, Hyderabad-500059,  
Telangana, India

<sup>c</sup>Department of Applied Biology, CSIR-Indian Institute of Chemical Technology, Hyderabad-  
500 007, India.

<sup>d</sup>Telangana Mahila Viswavidyalayam, Hyderabad – 500095, Telangana Hyderabad, India

**Supplementary Information**

- 1. <sup>1</sup>H NMR & <sup>13</sup>C NMR SPECTRA COPIES**
- 2. HRMS/ESI-MS COPIES**

5-((1H-pyrrolo[2,3-b]pyridin-3-yl)methylene)-2,2-dimethyl-1,3-dioxane-4,6-dione (3):

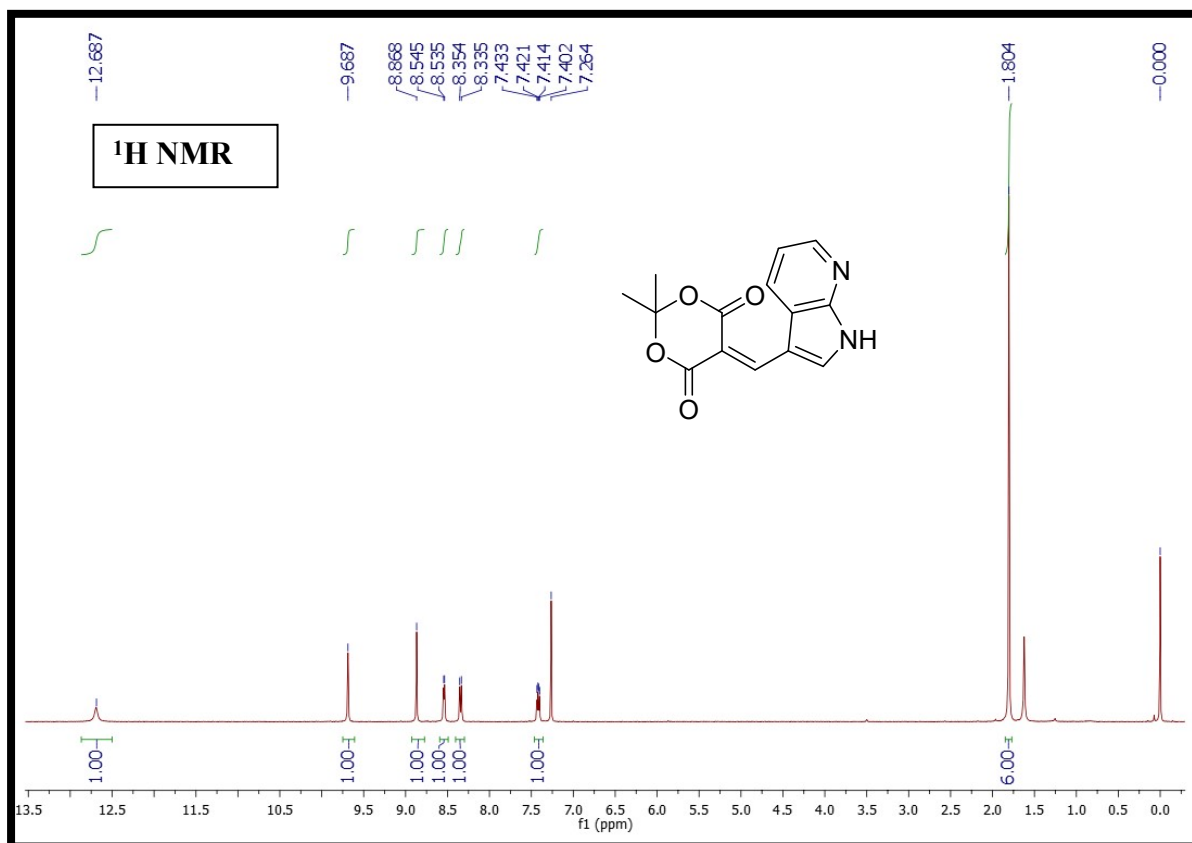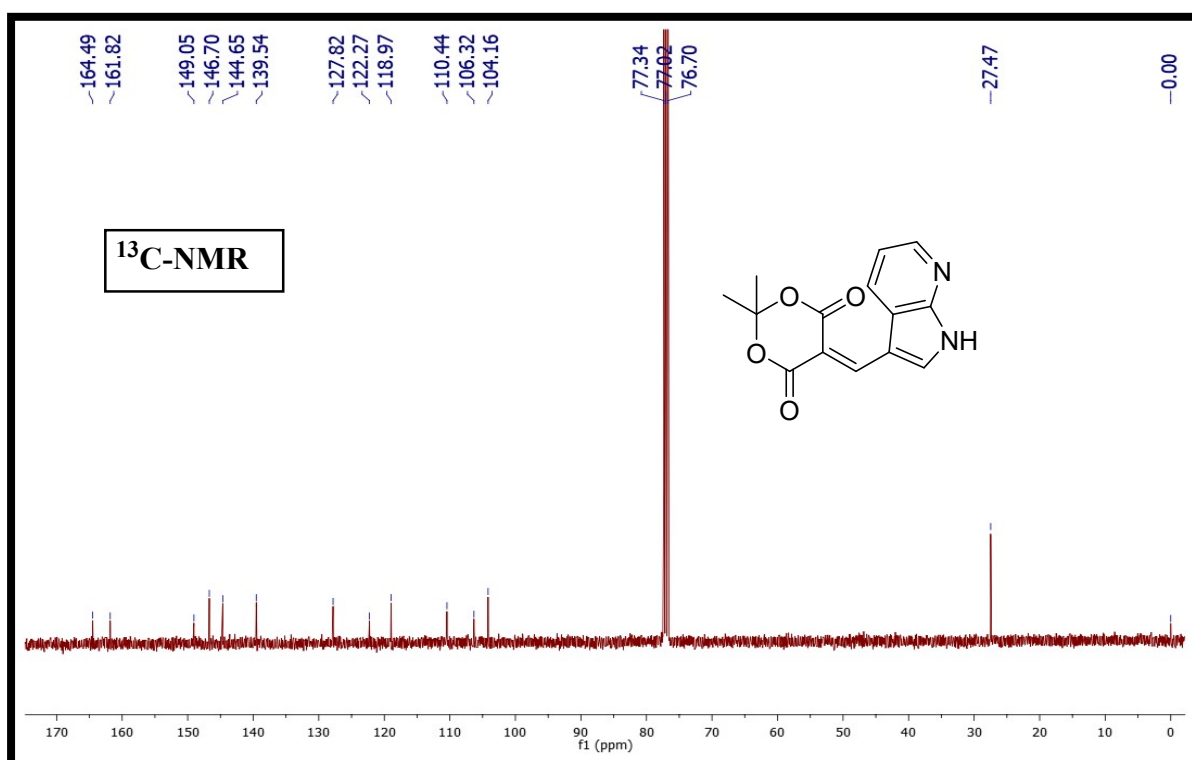

**2,2-dimethyl-5-((1-(prop-2-yn-1-yl)-1H-pyrrolo[2,3-b]pyridin-3-yl)methylene)-1,3-dioxane-4,6-dione (4):**

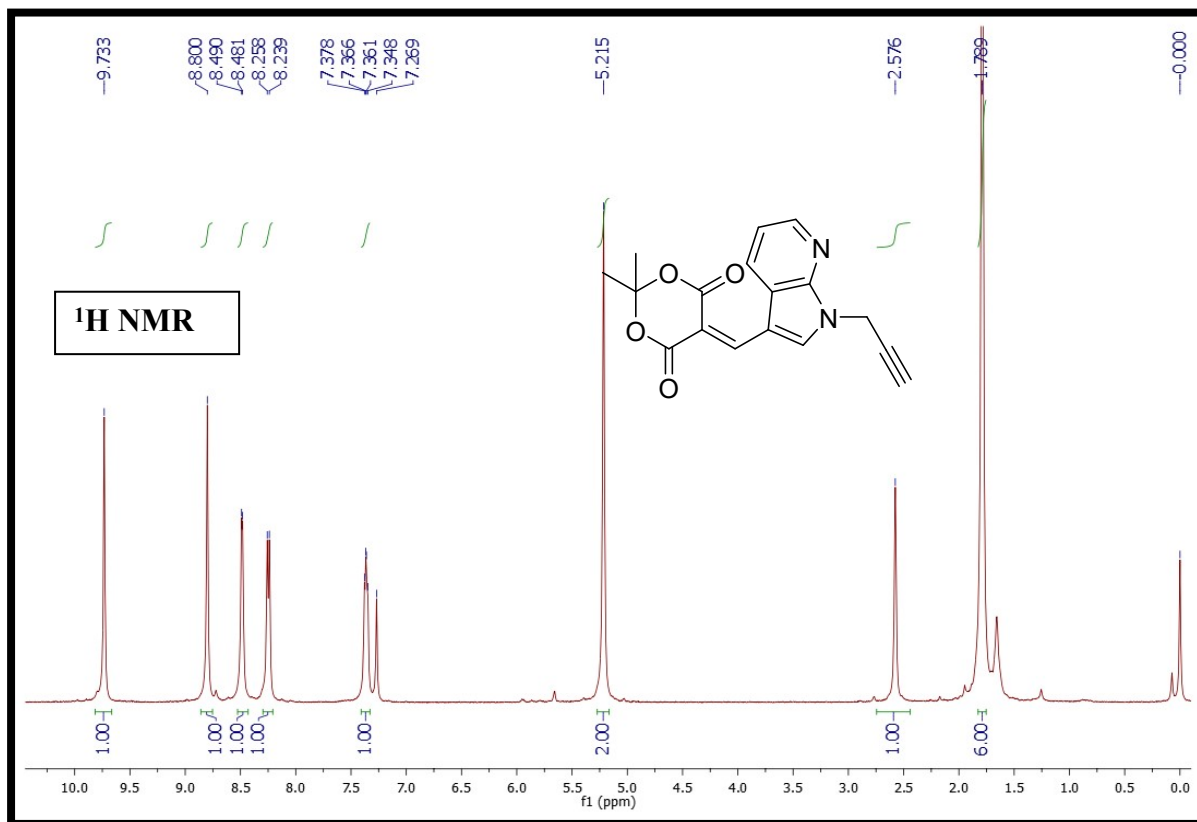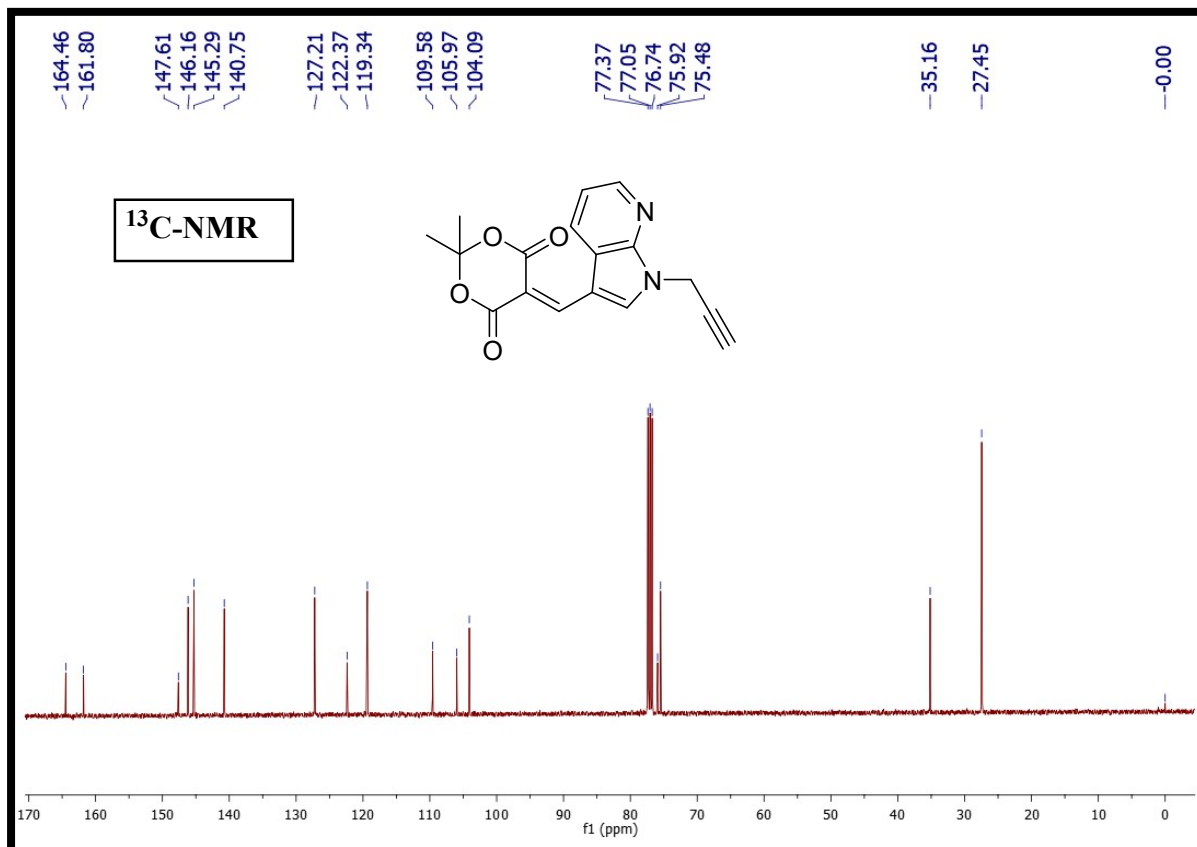

2,2-dimethyl-5-((1-((1-phenyl-1H-1,2,3-triazol-4-yl)methyl)-1H-pyrrolo[2,3-b]pyridin-3-yl)methylene)-1,3-dioxane-4,6-dione (6a):

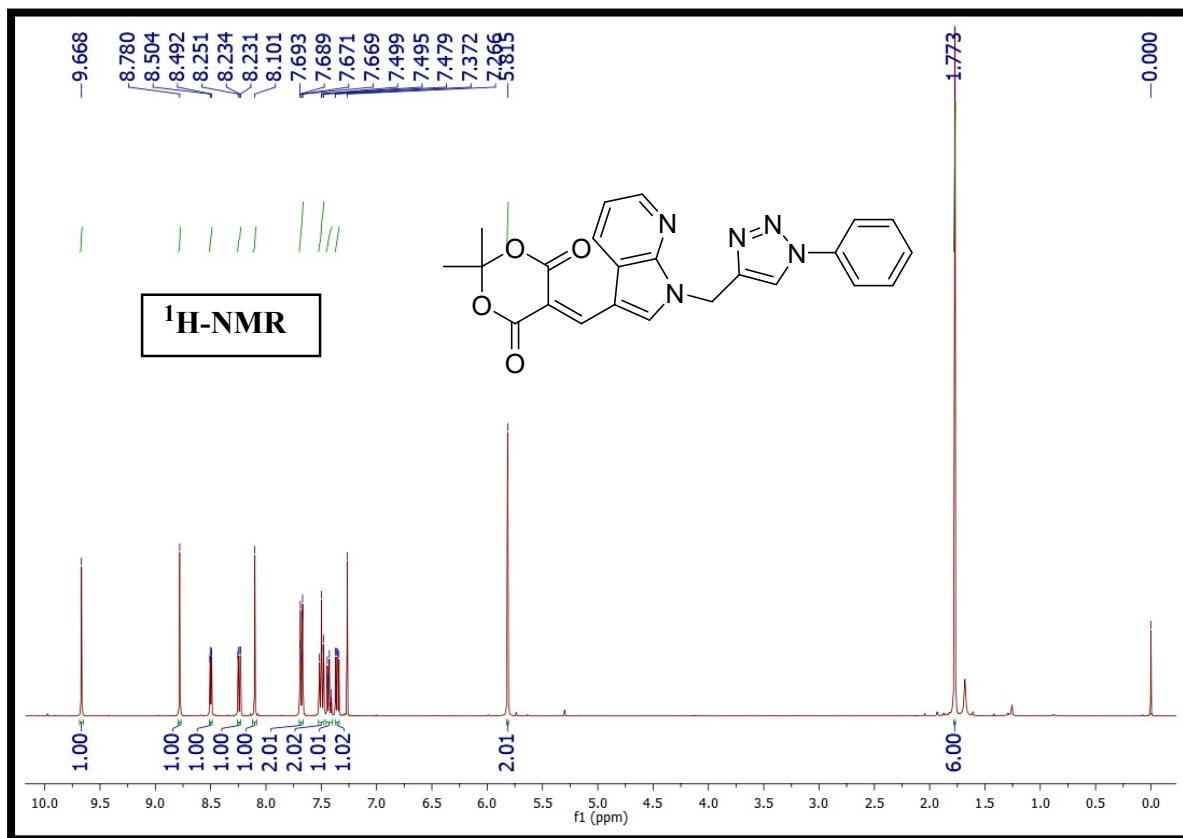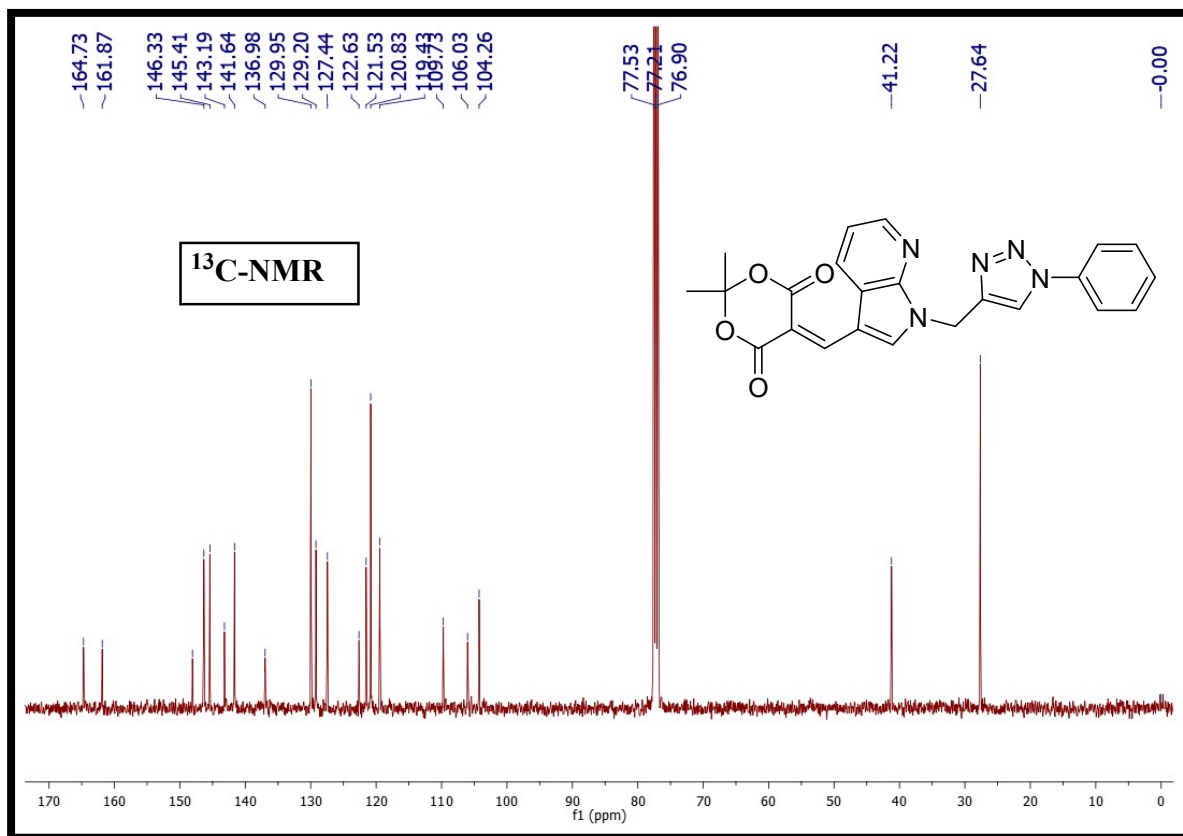

**2,2-dimethyl-5-((1-((1-(p-tolyl)-1H-1,2,3-triazol-4-yl)methyl)-1H-pyrrolo[2,3-b]pyridin-3-yl)methylene)-1,3-dioxane-4,6-dione (6b):**

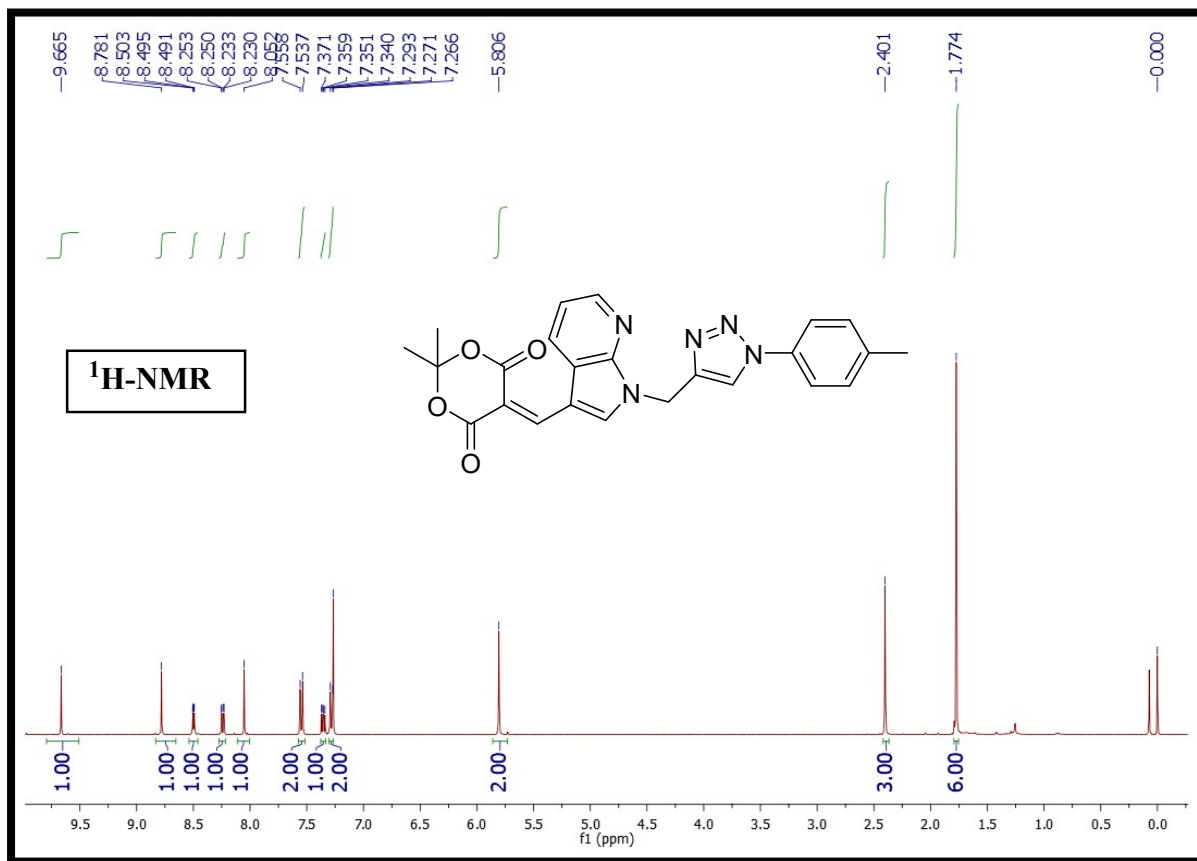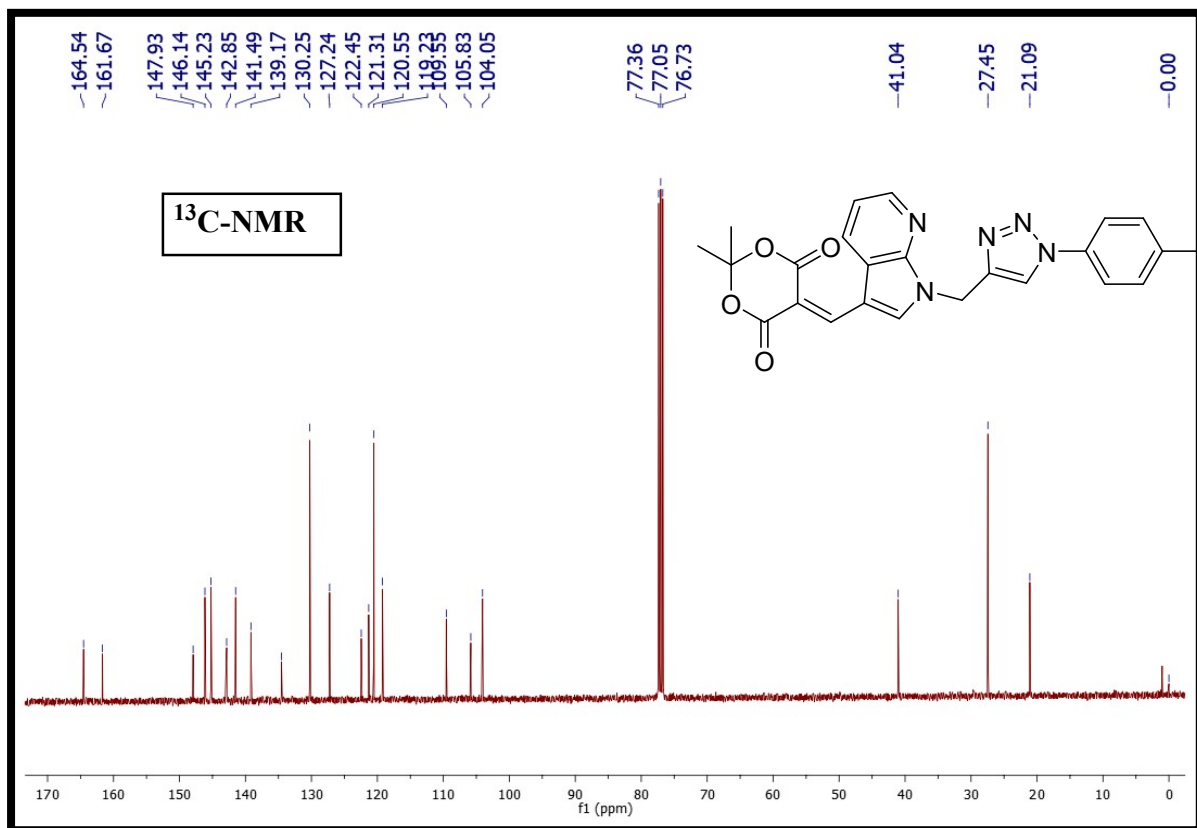

5-((1-((1-(4-bromophenyl)-1H-1,2,3-triazol-4-yl)methyl)-1H-pyrrolo[2,3-b]pyridin-3-yl)methylene)-2,2-dimethyl-1,3-dioxane-4,6-dione (6c):

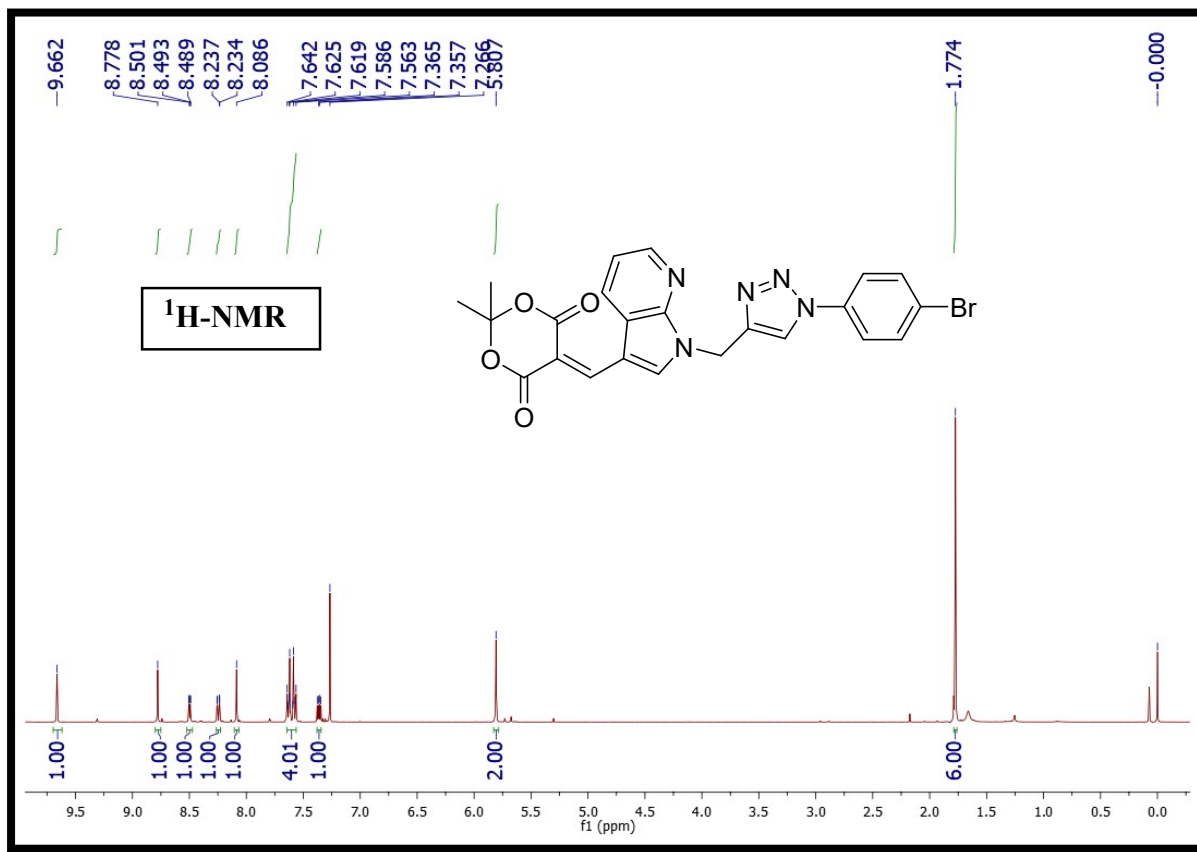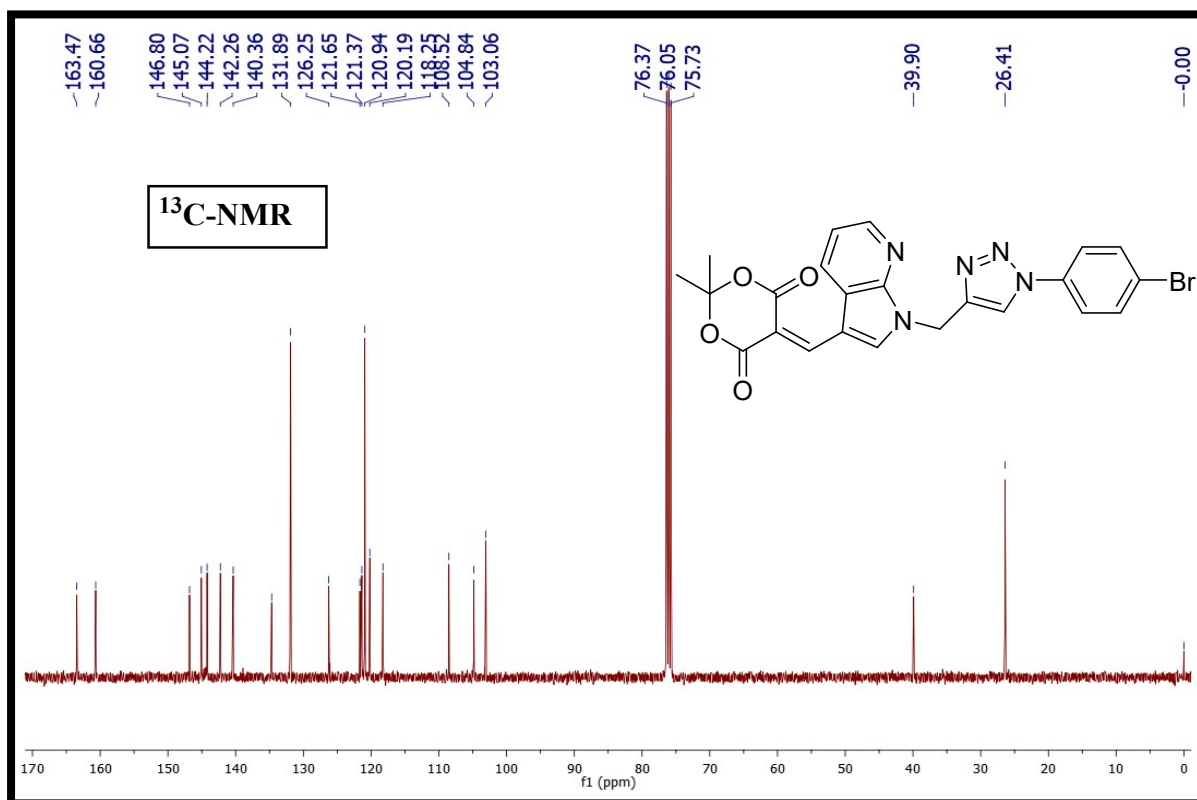

5-((1-((1-(2-chlorophenyl)-1H-1,2,3-triazol-4-yl)methyl)-1H-pyrrolo[2,3-b]pyridin-3-yl)methylene)-2,2-dimethyl-1,3-dioxane-4,6-dione (6d):

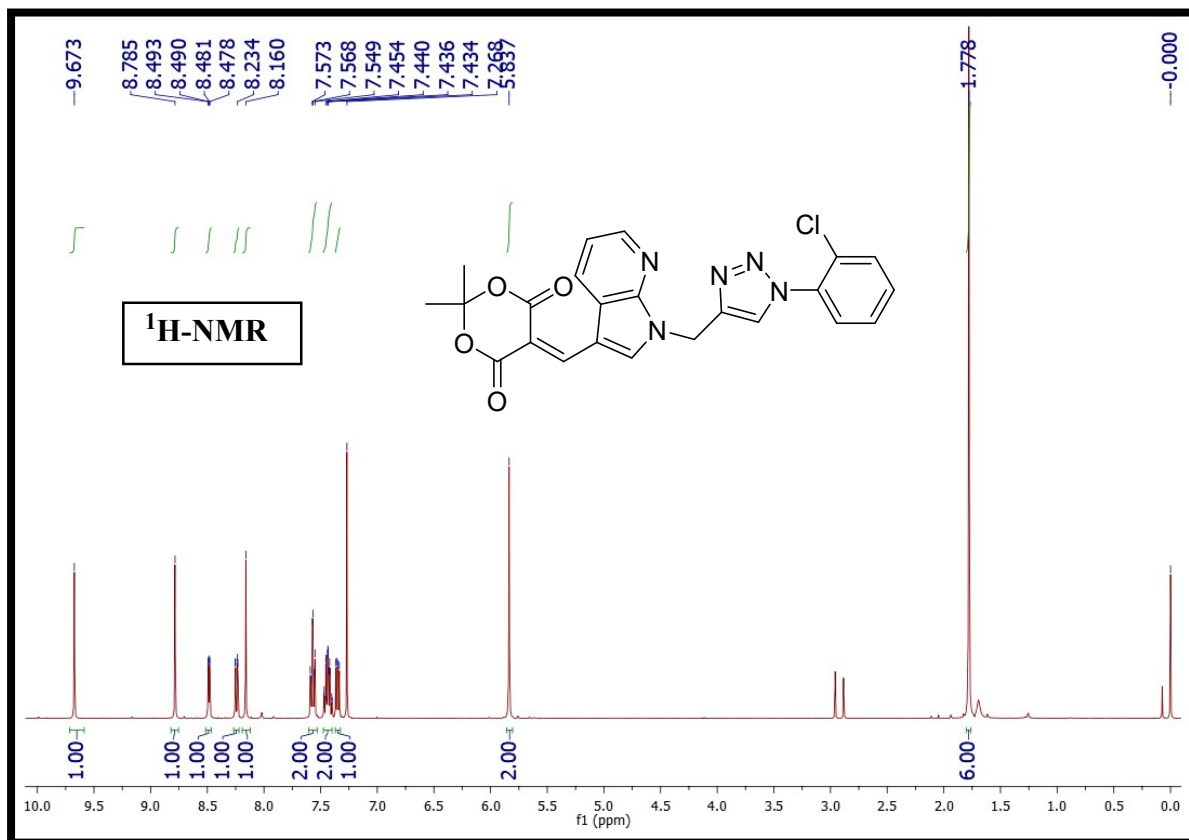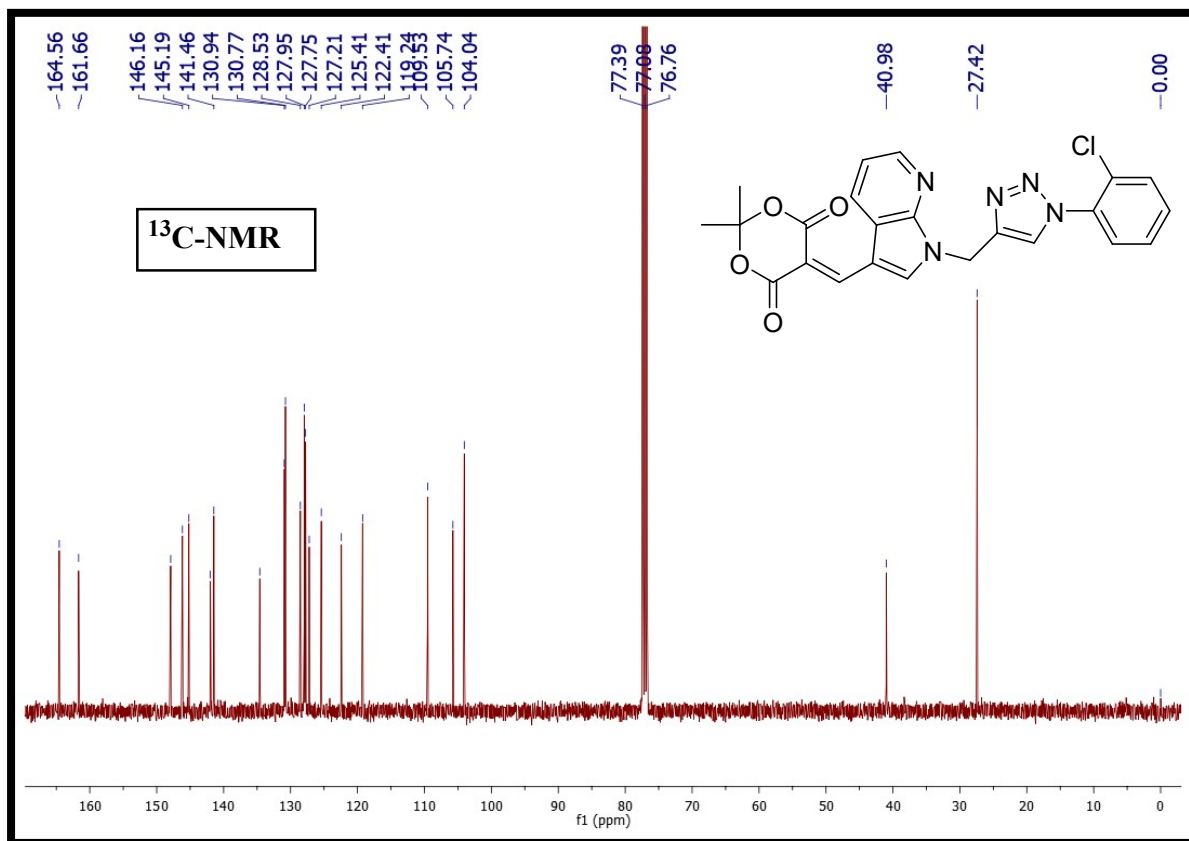

5-((1-((1-(3-chlorophenyl)-1H-1,2,3-triazol-4-yl)methyl)-1H-pyrrolo[2,3-b]pyridin-3-yl)methylene)-2,2-dimethyl-1,3-dioxane-4,6-dione (6e):

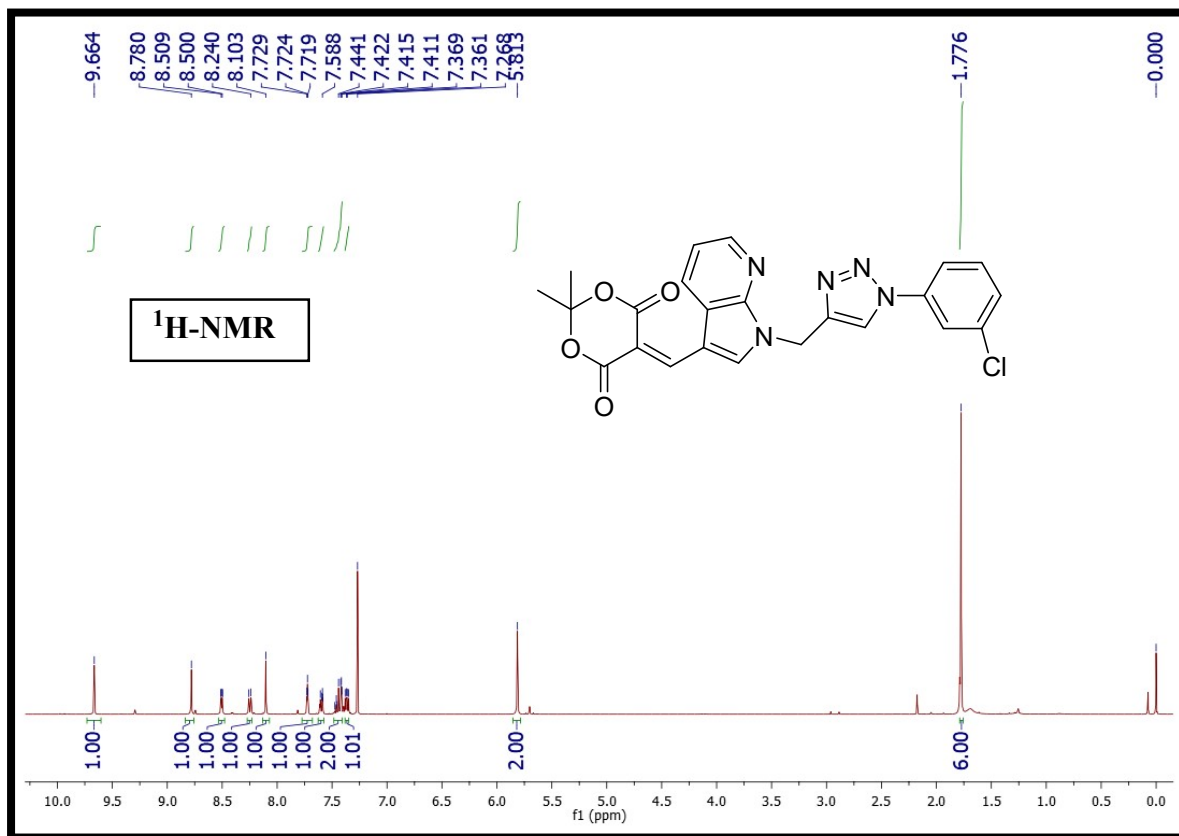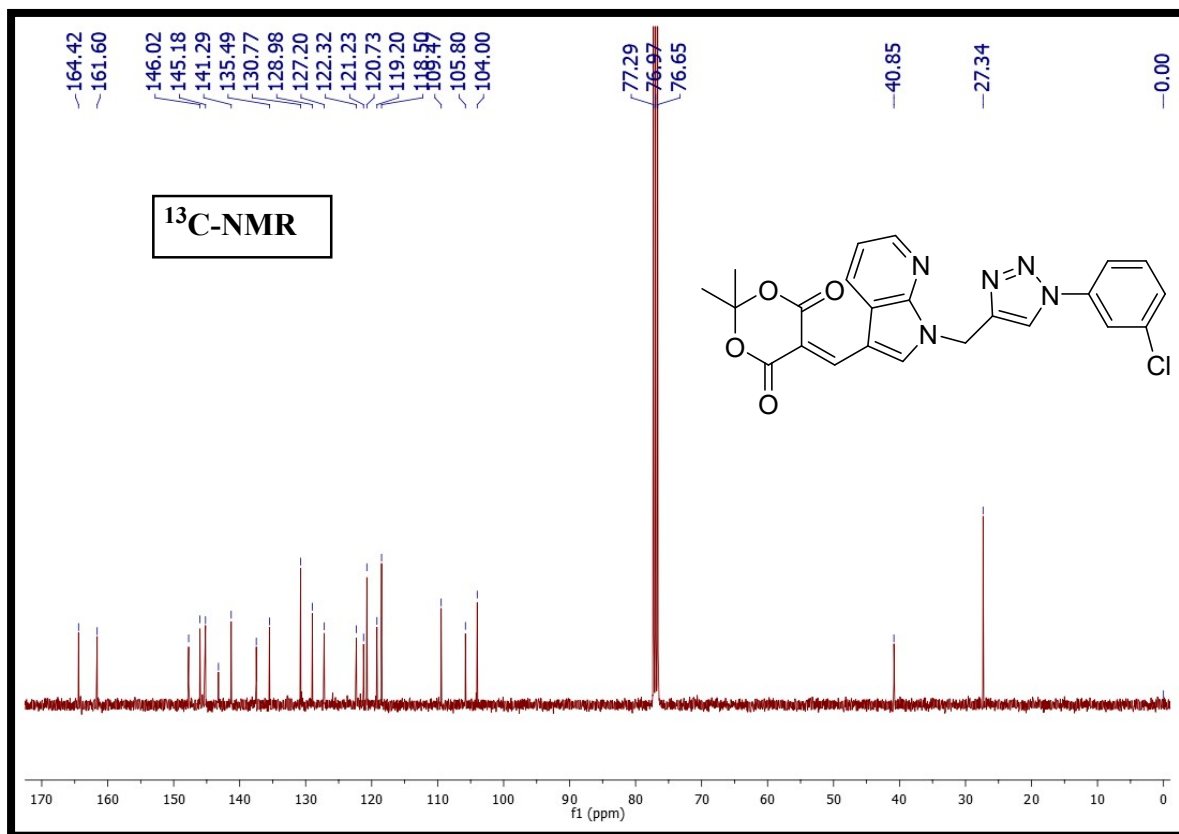



5-((1-((1-(4-chlorophenyl)-1H-1,2,3-triazol-4-yl)methyl)-1H-pyrrolo[2,3-b]pyridin-3-yl)methylene)-2,2-dimethyl-1,3-dioxane-4,6-dione (6f):

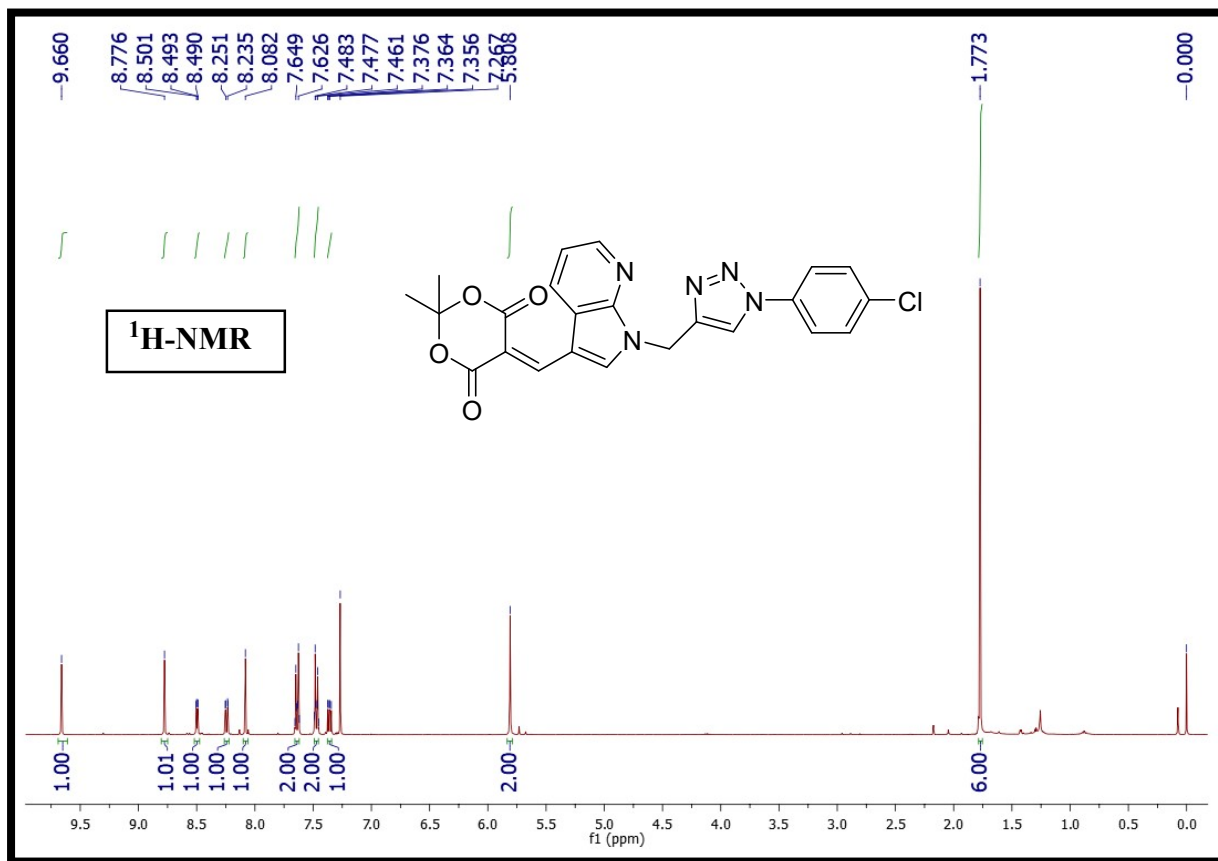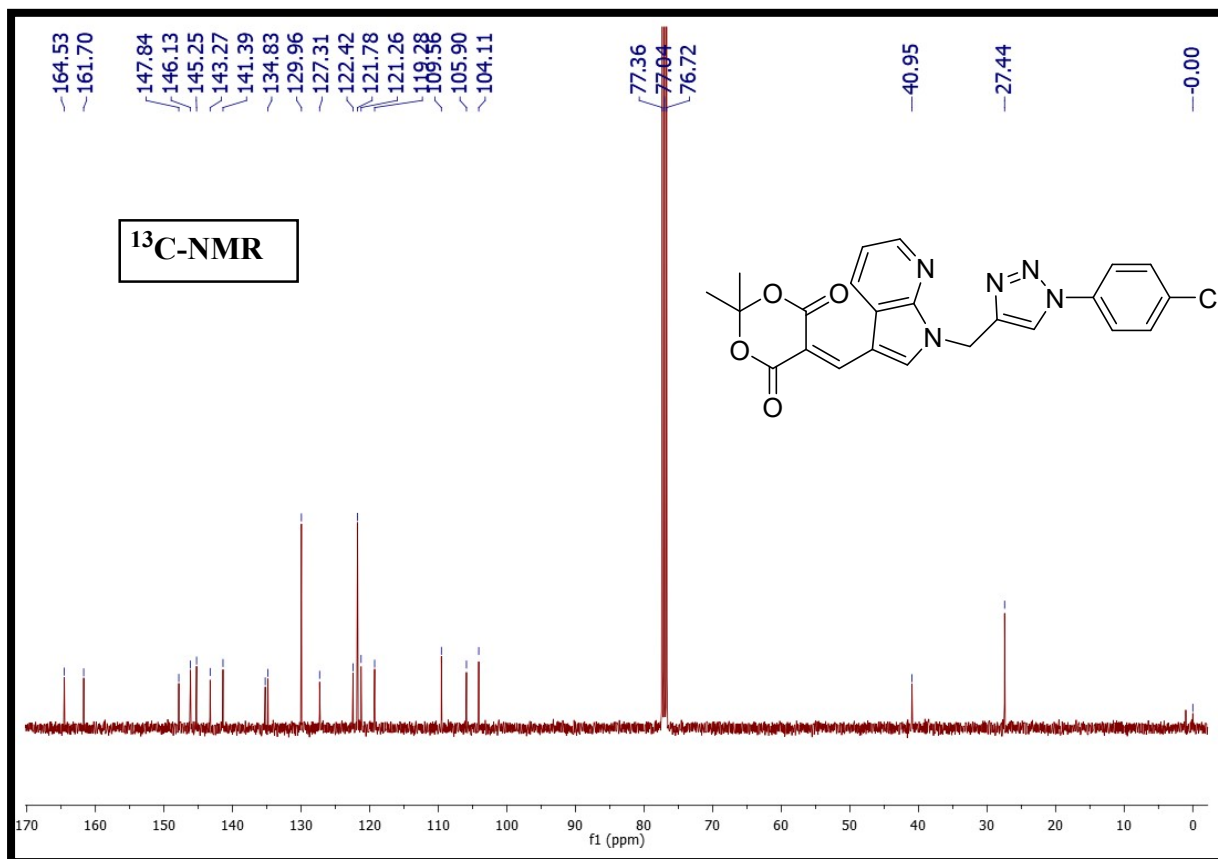

5-((1-((1-(3,4-dichlorophenyl)-1H-1,2,3-triazol-4-yl)methyl)-1H-pyrrolo[2,3-b]pyridin-3-yl)methylene)-2,2-dimethyl-1,3-dioxane-4,6-dione (6g):

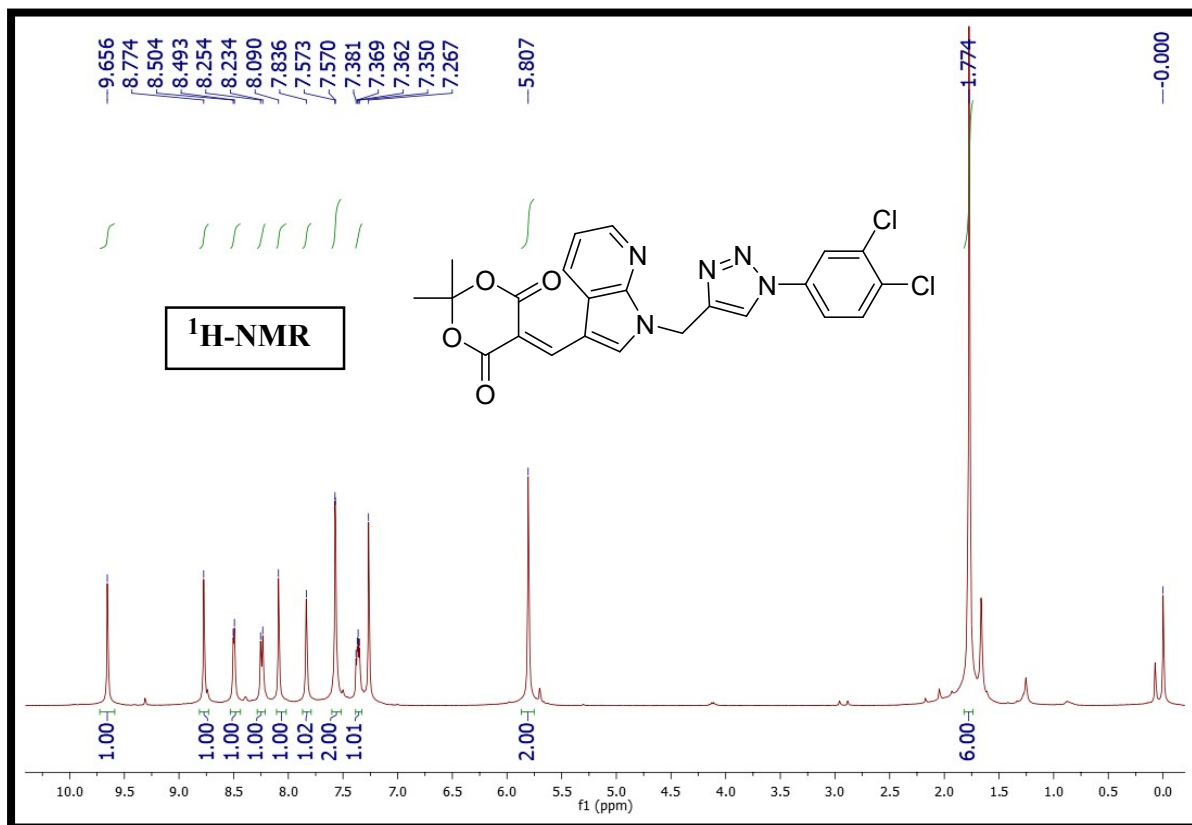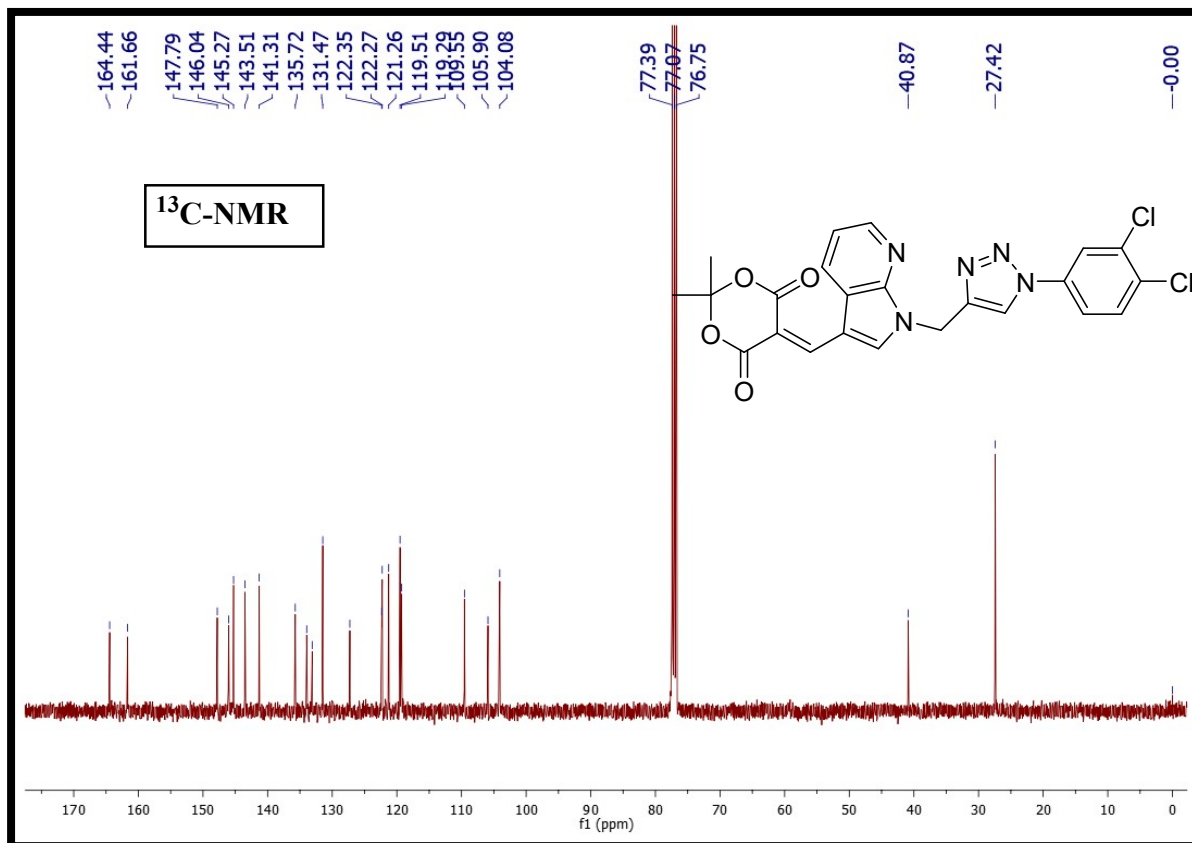

5-((1-((1-(3,5-dichlorophenyl)-1H-1,2,3-triazol-4-yl)methyl)-1H-pyrrolo[2,3-b]pyridin-3-yl)methylene)-2,2-dimethyl-1,3-dioxane-4,6-dione (6h):

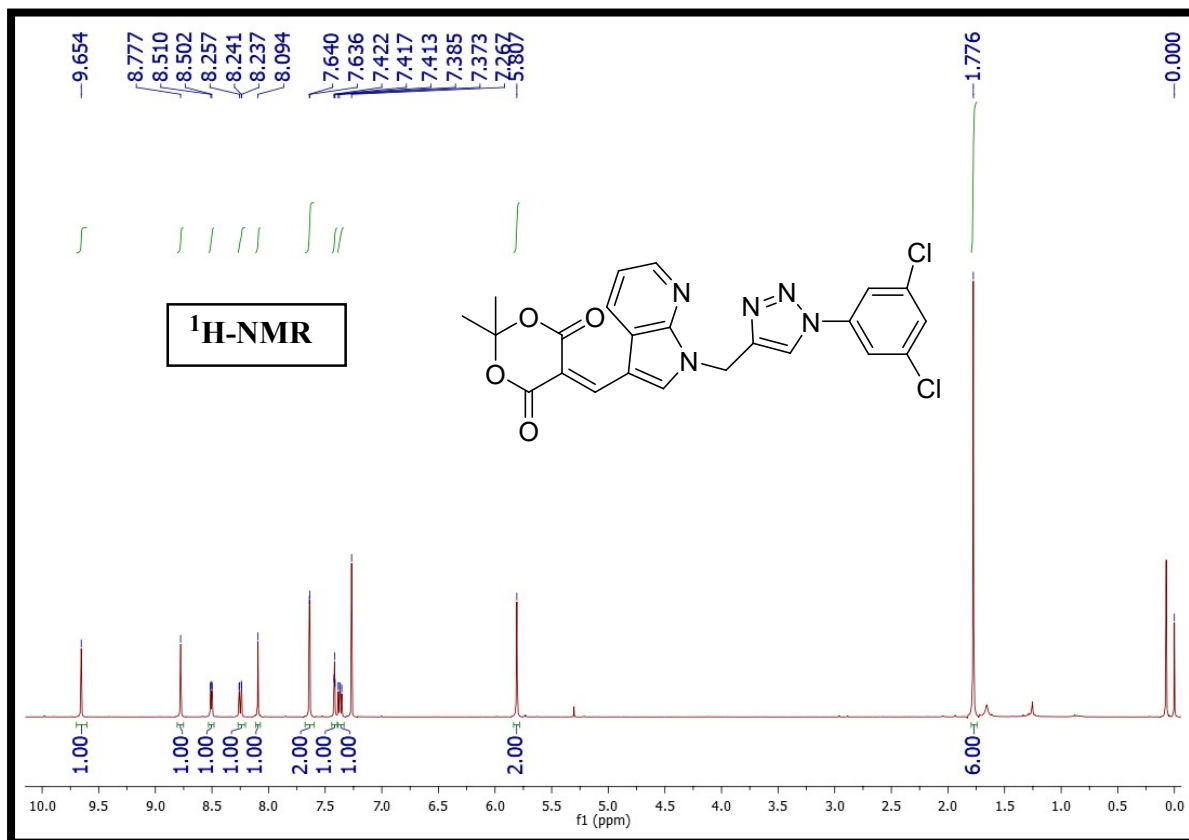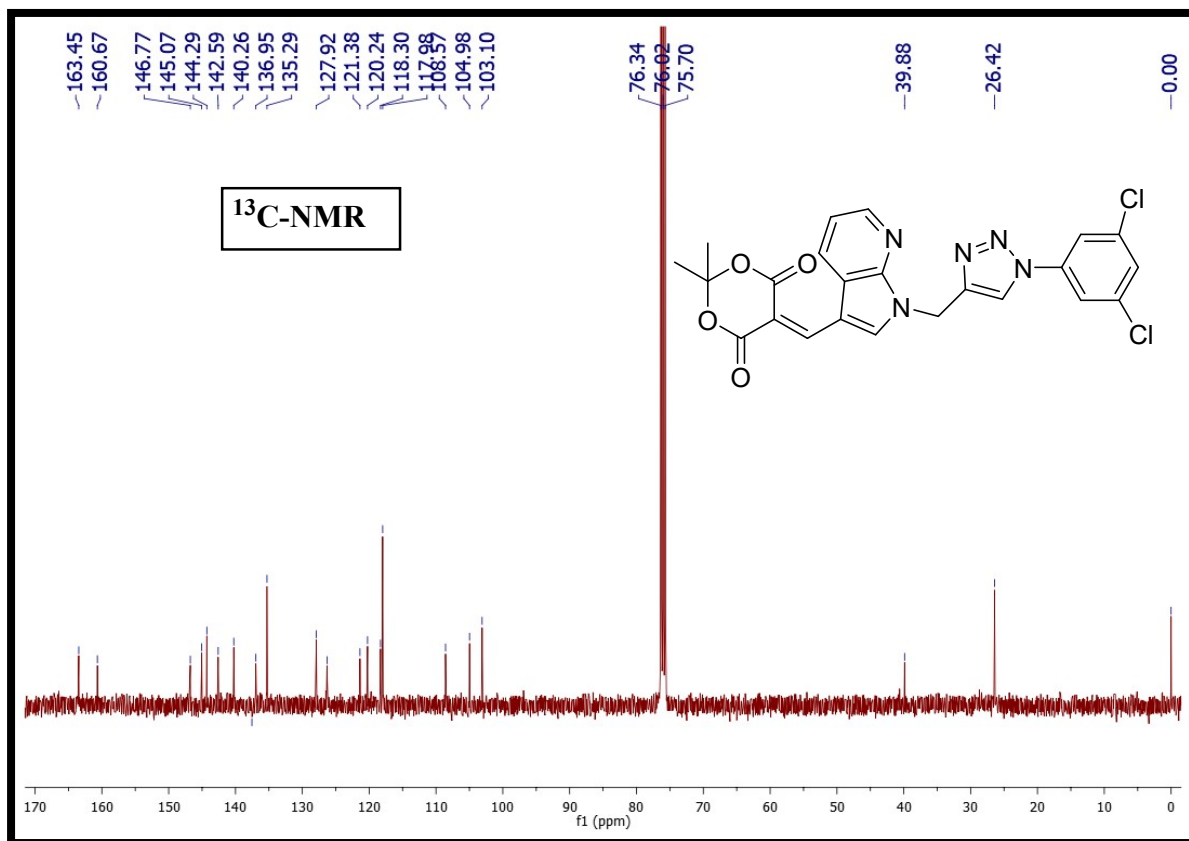

**5-((1-((1-(4-fluorophenyl)-1H-1,2,3-triazol-4-yl)methyl)-1H-pyrrolo[2,3-b]pyridin-3-yl)methylene)-2,2-dimethyl-1,3-dioxane-4,6-dione (6i):**

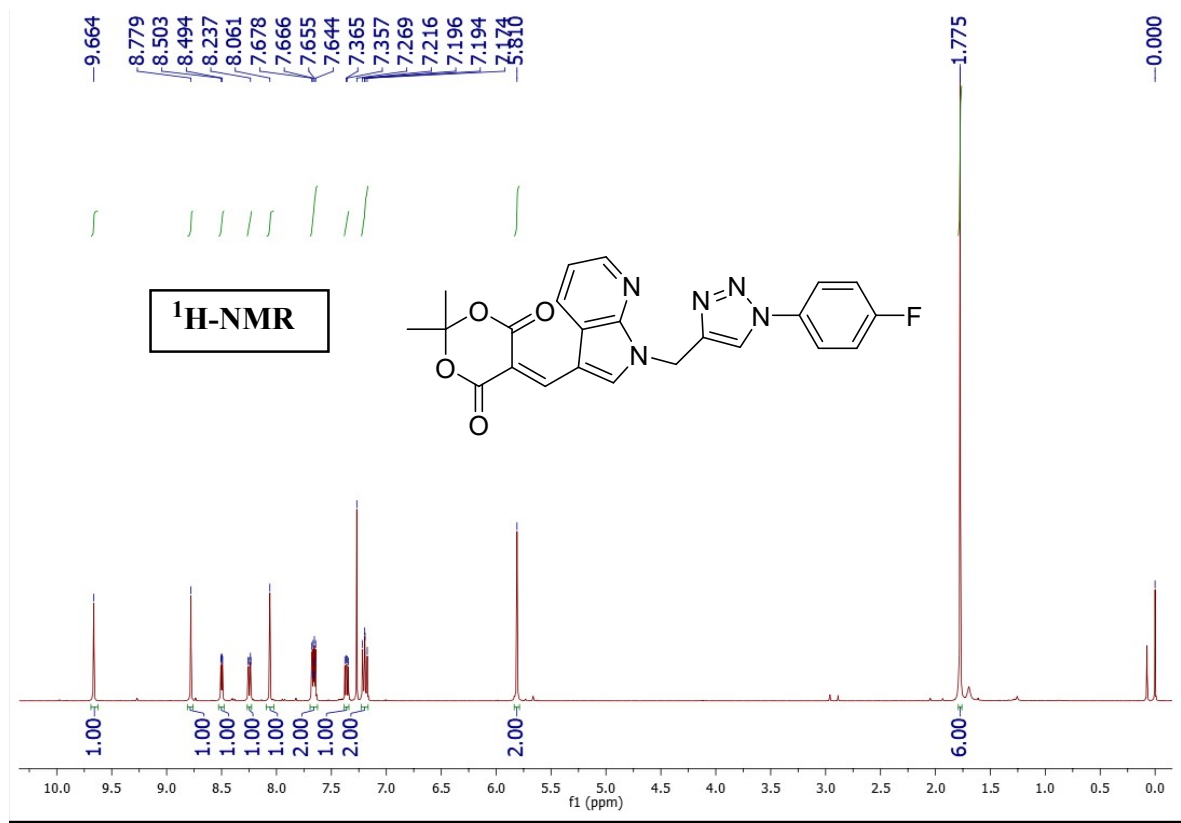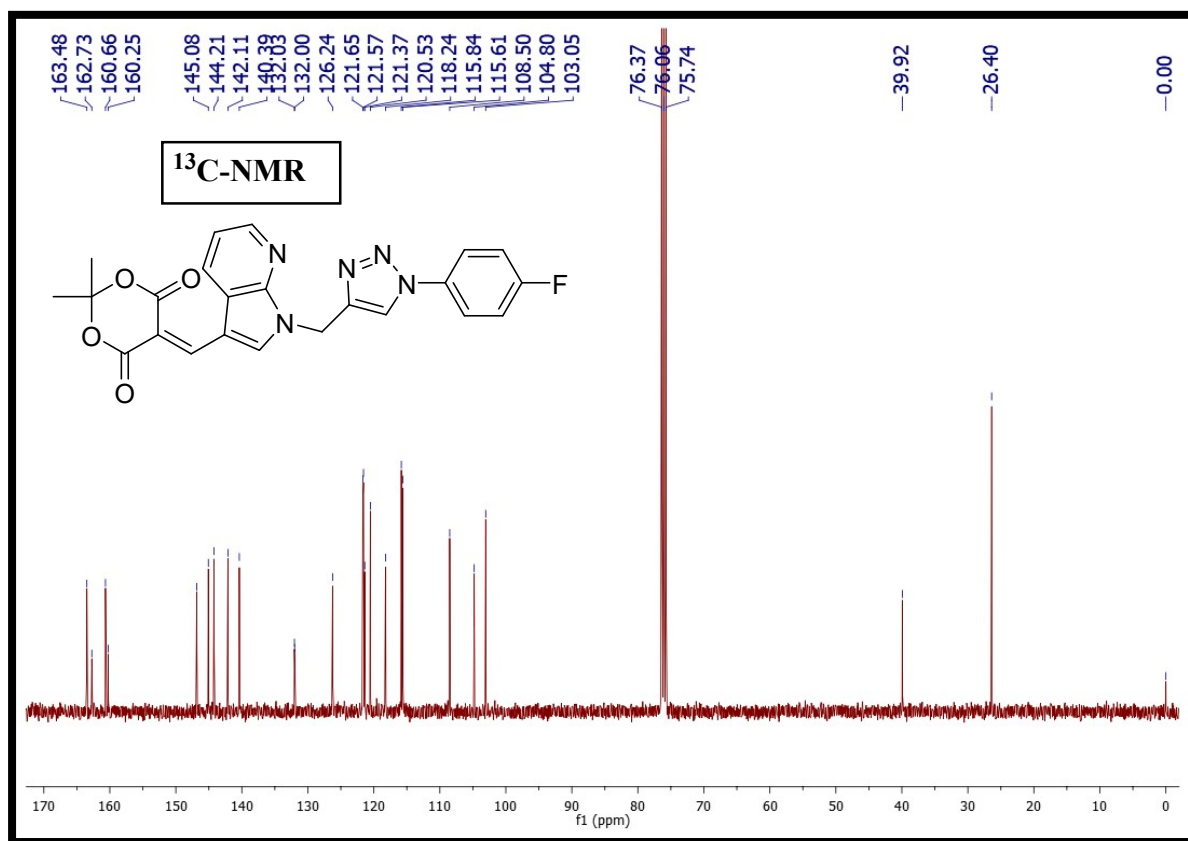

5-((1-((1-(4-bromo-2-fluorophenyl)-1H-1,2,3-triazol-4-yl)methyl)-1H-pyrrolo[2,3-b]pyridin-3-yl)methylene)-2,2-dimethyl-1,3-dioxane-4,6-dione (6j):

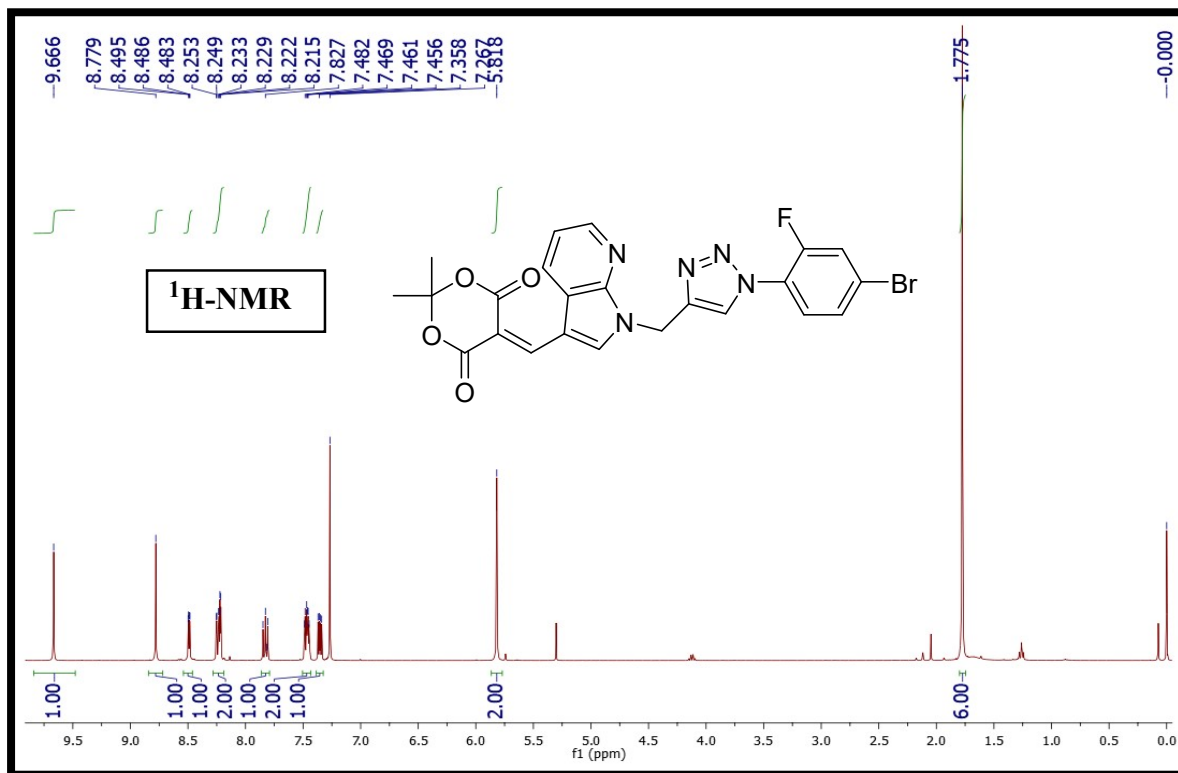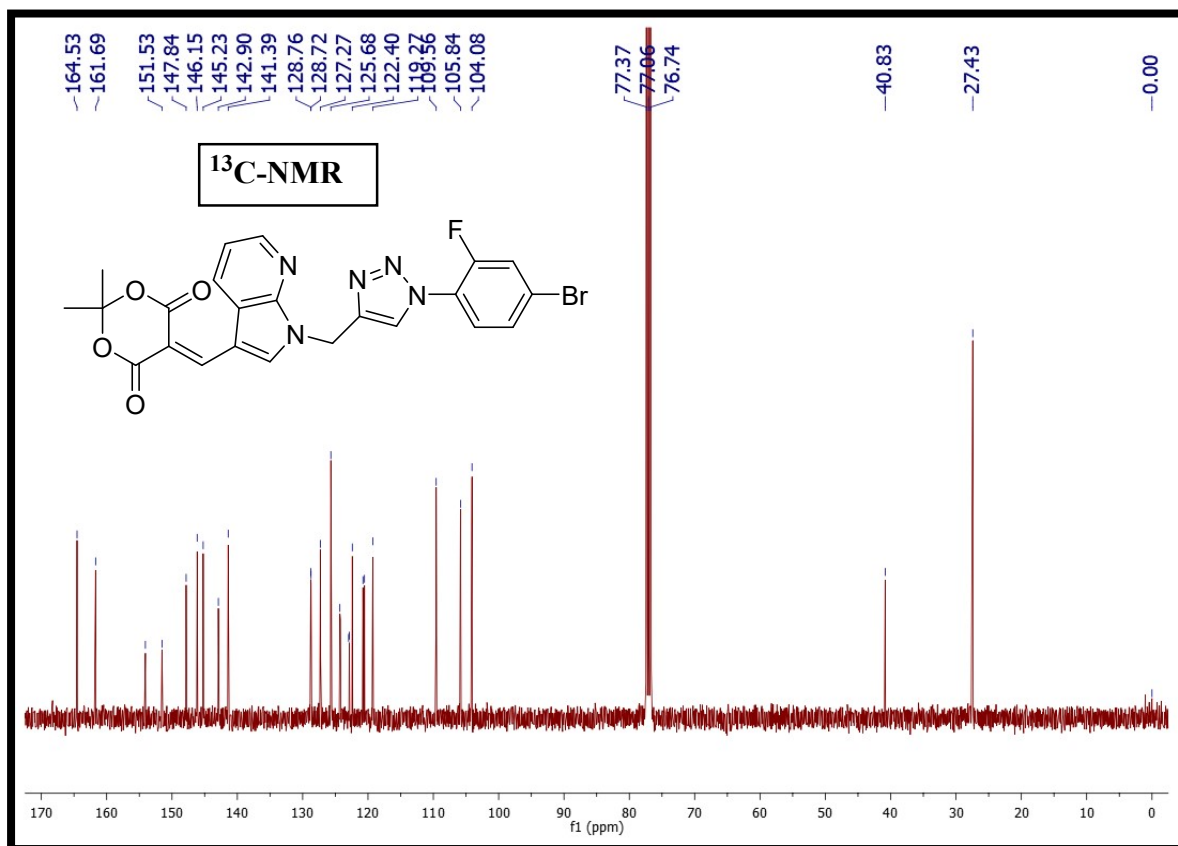

5-((1-((1-(4-iodophenyl)-1H-1,2,3-triazol-4-yl)methyl)-1H-pyrrolo[2,3-b]pyridin-3-yl)methylene)-2,2-dimethyl-1,3-dioxane-4,6-dione (6k):

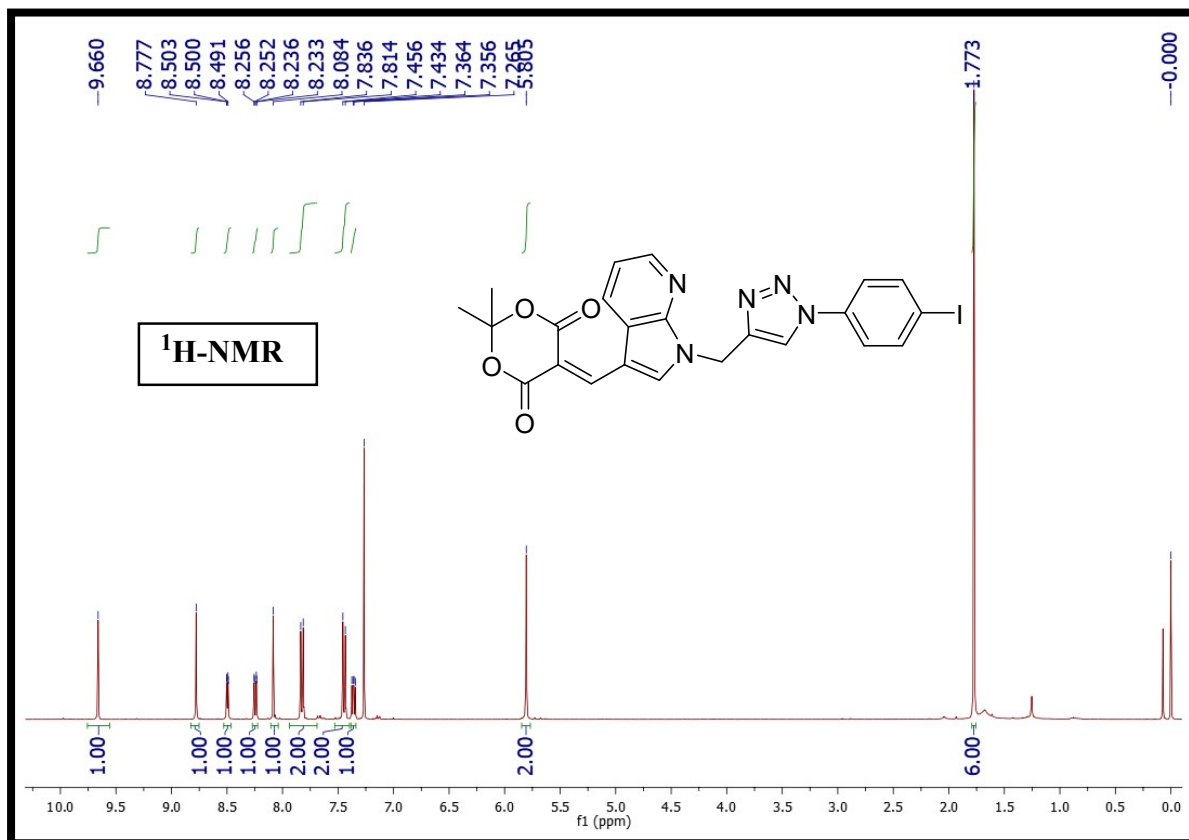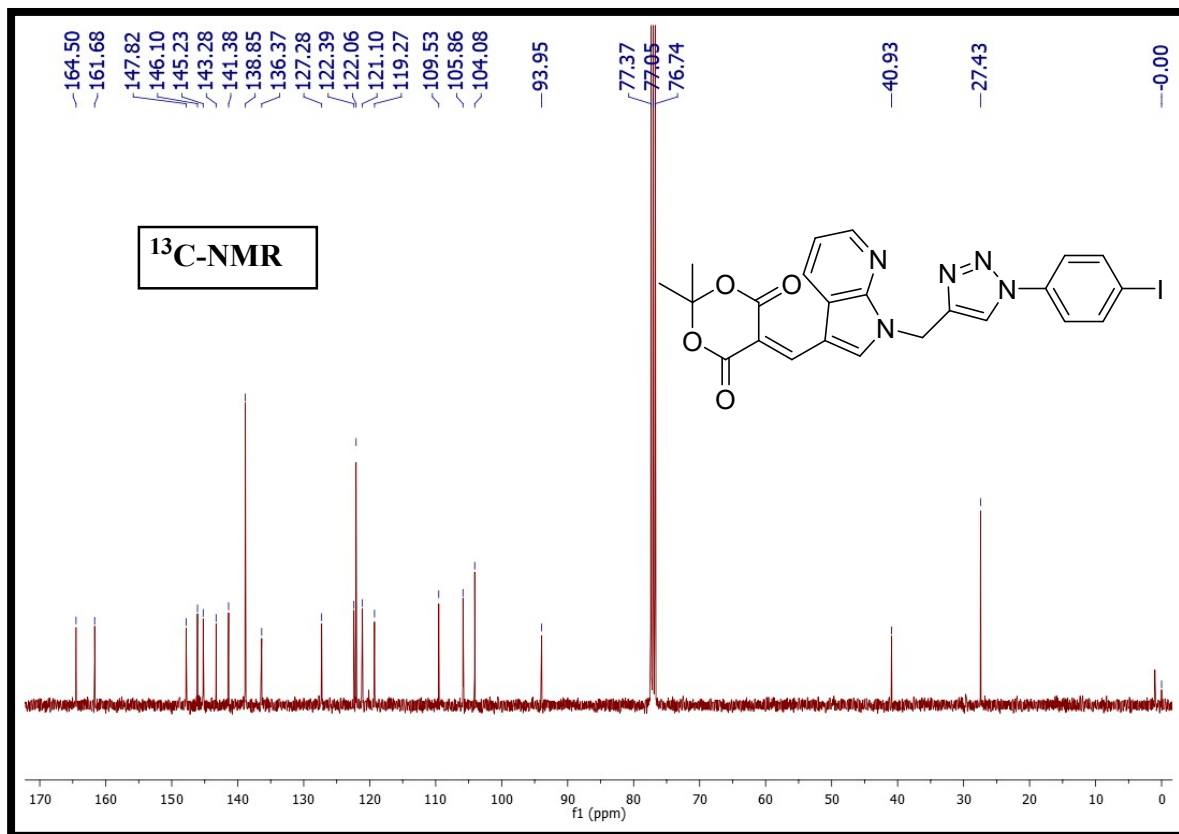

**5-((1-((1-(4-methoxyphenyl)-1H-1,2,3-triazol-4-yl)methyl)-1H-pyrrolo[2,3-b]pyridin-3-yl)methylene)-2,2-dimethyl-1,3-dioxane-4,6-dione (6l):**

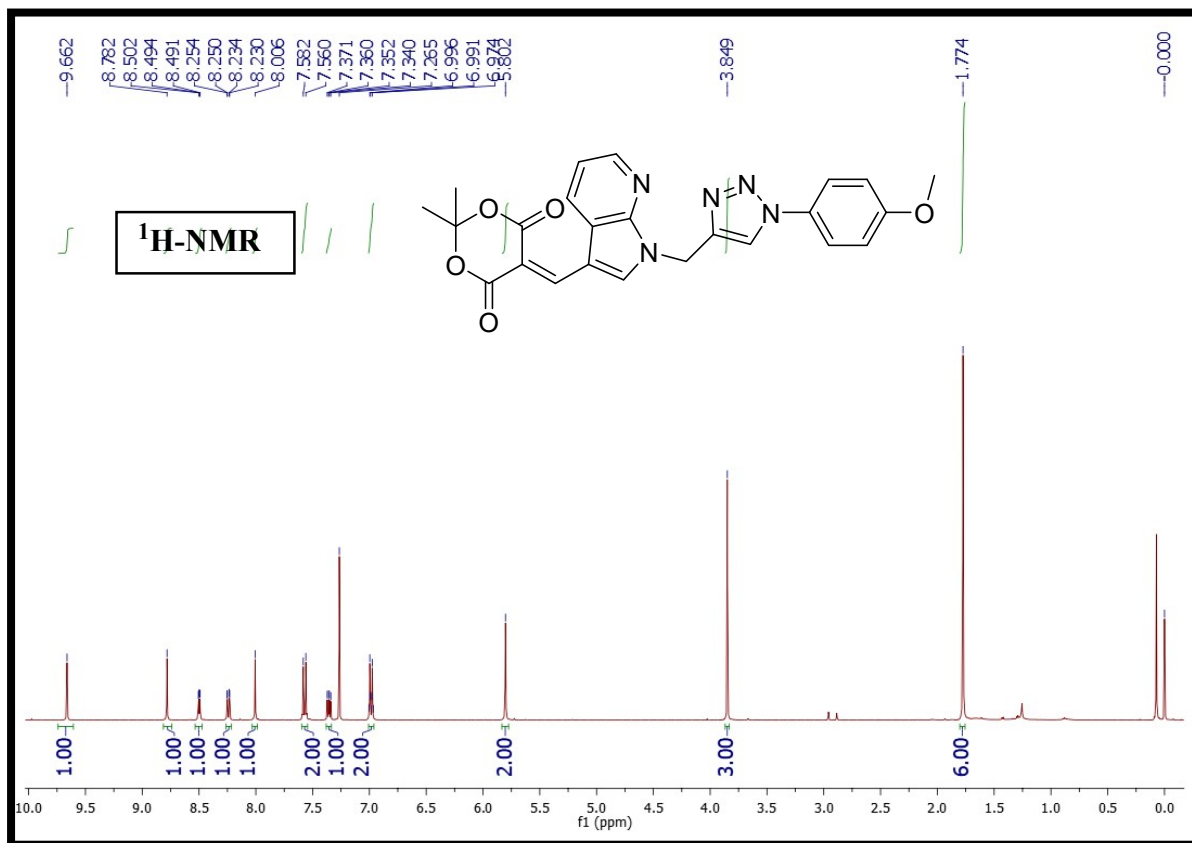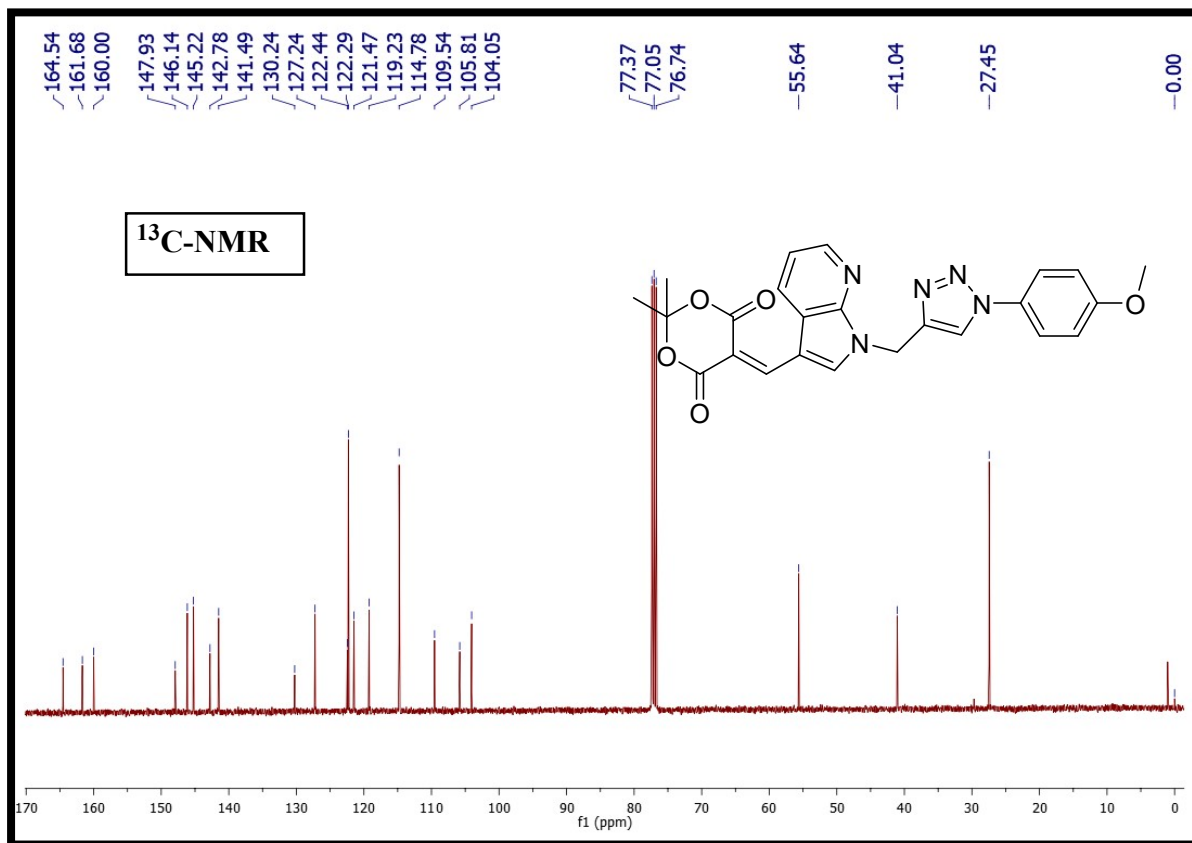

5-((1-((1-(3,5-dimethoxyphenyl)-1H-1,2,3-triazol-4-yl)methyl)-1H-pyrrolo[2,3-b]pyridin-3-yl)methylene)-2,2-dimethyl-1,3-dioxane-4,6-dione (6m):

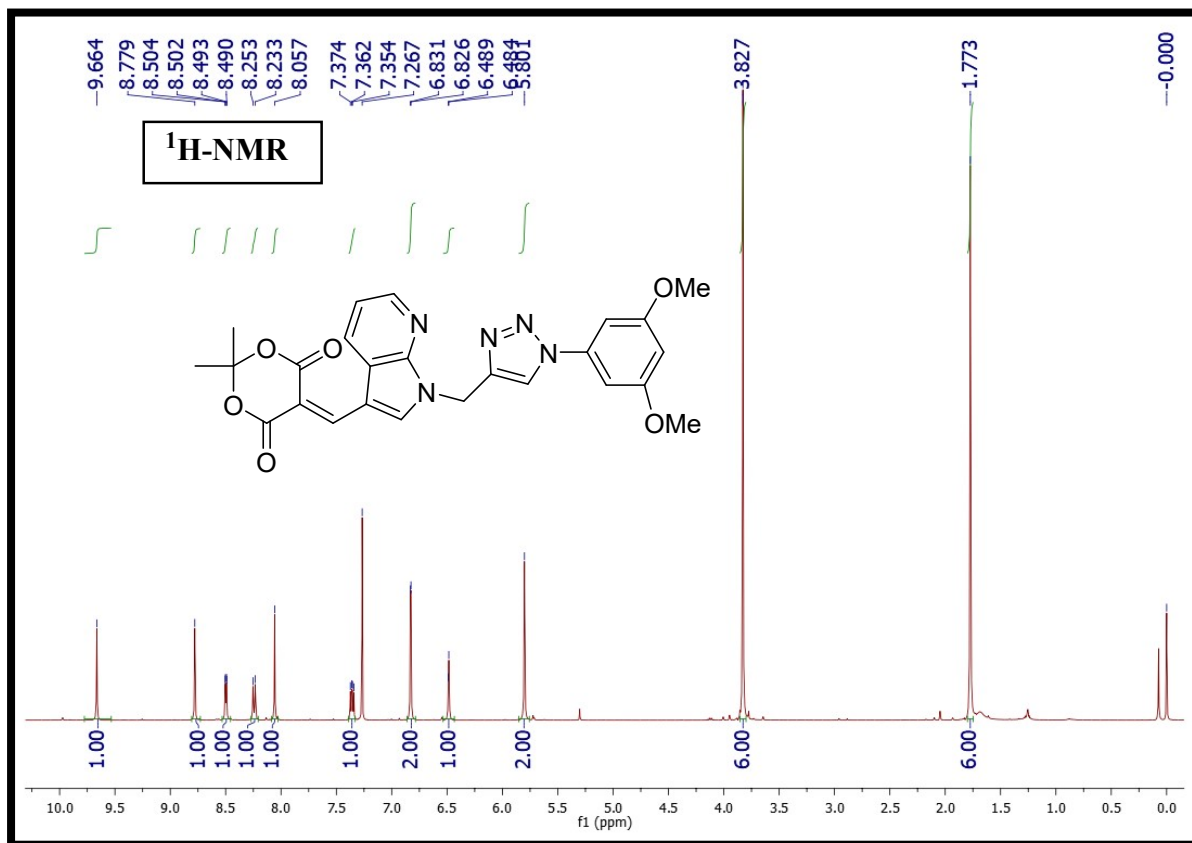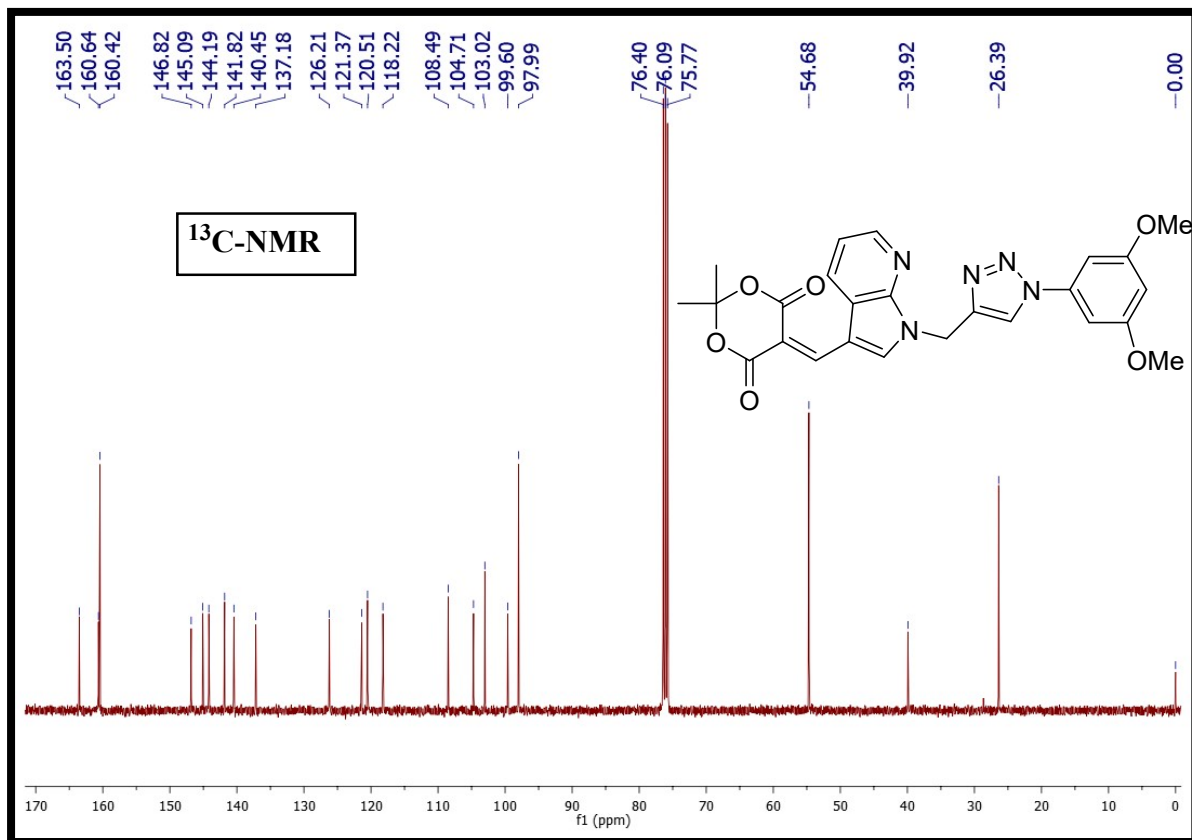



**2,2-dimethyl-5-((1-((1-(3,4,5-trimethoxyphenyl)-1H-1,2,3-triazol-4-yl)methyl)-1H-pyrrolo[2,3-b]pyridin-3-yl)methylene)-1,3-dioxane-4,6-dione (6n):**

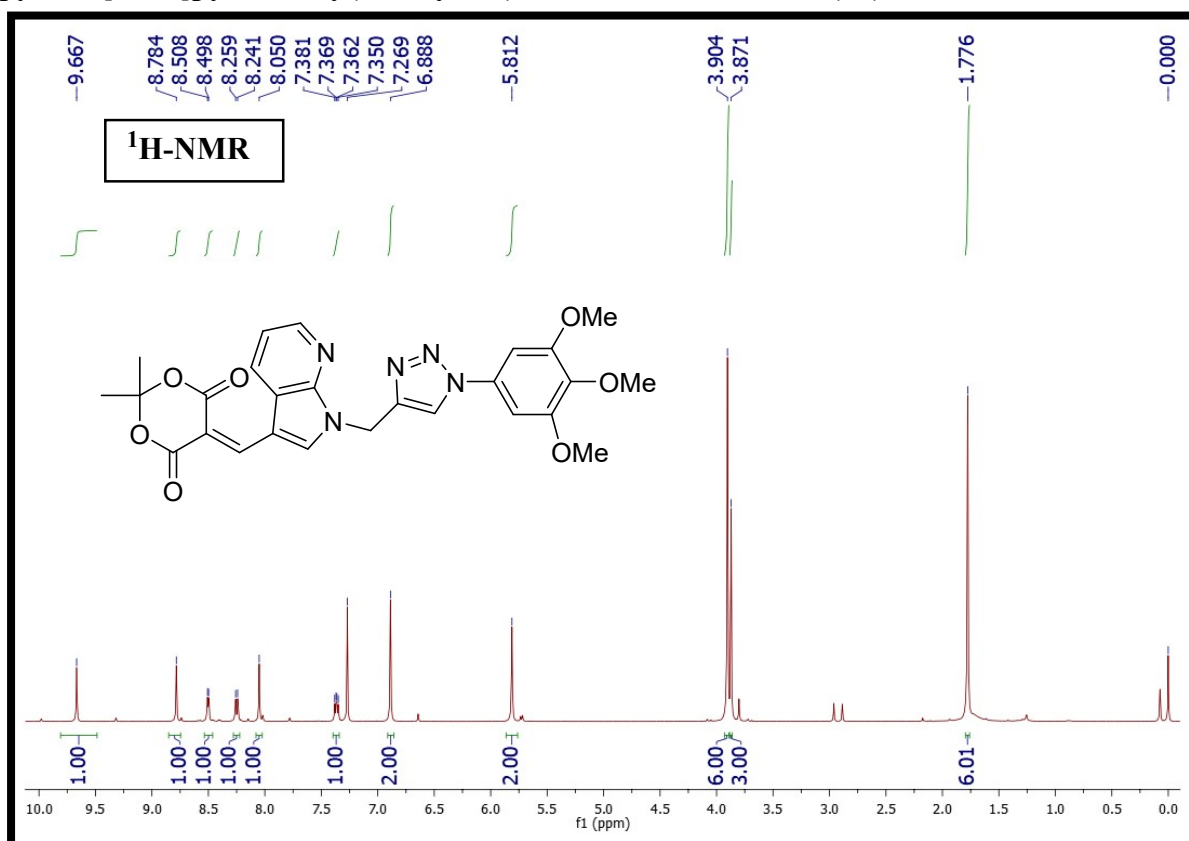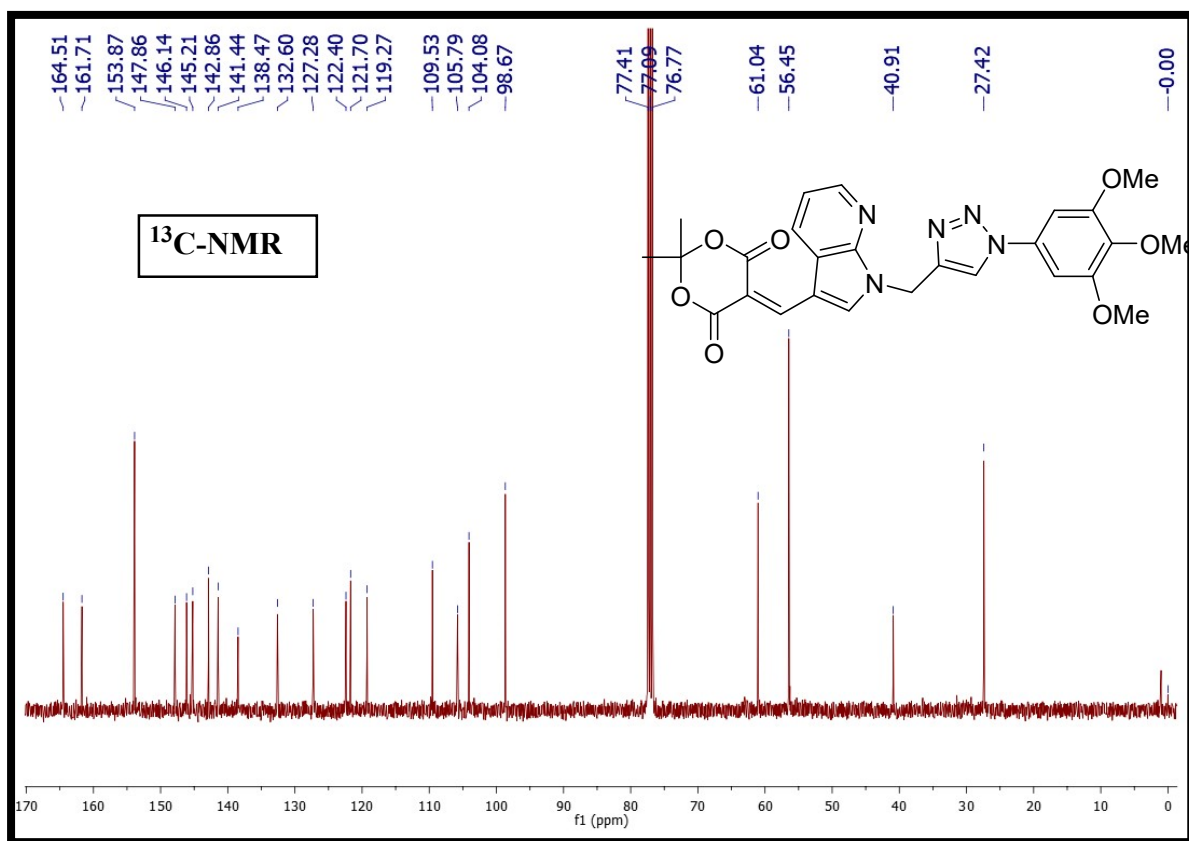

**2,2-dimethyl-5-((1-((1-(4-nitrophenyl)-1H-1,2,3-triazol-4-yl)methyl)-1H-pyrrolo[2,3-b]pyridin-3-yl)methylene)-1,3-dioxane-4,6-dione (6o):**

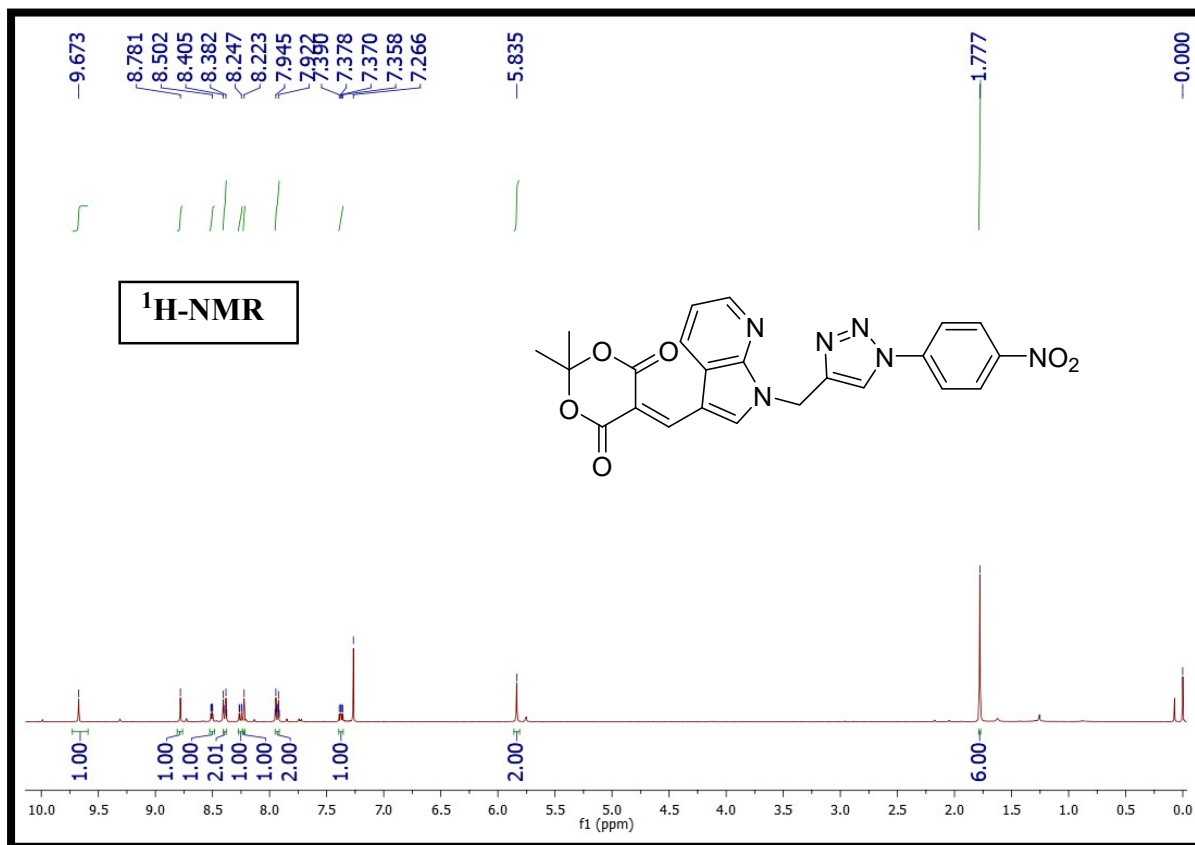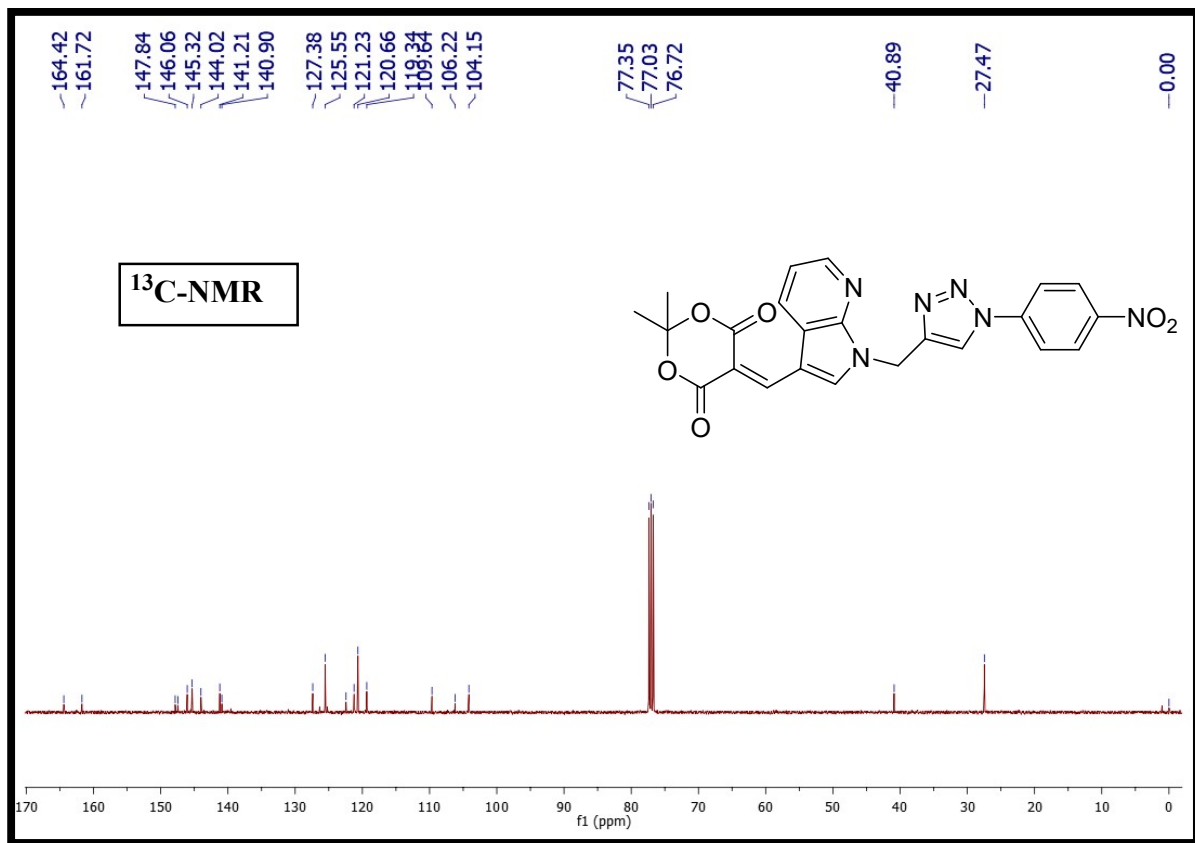

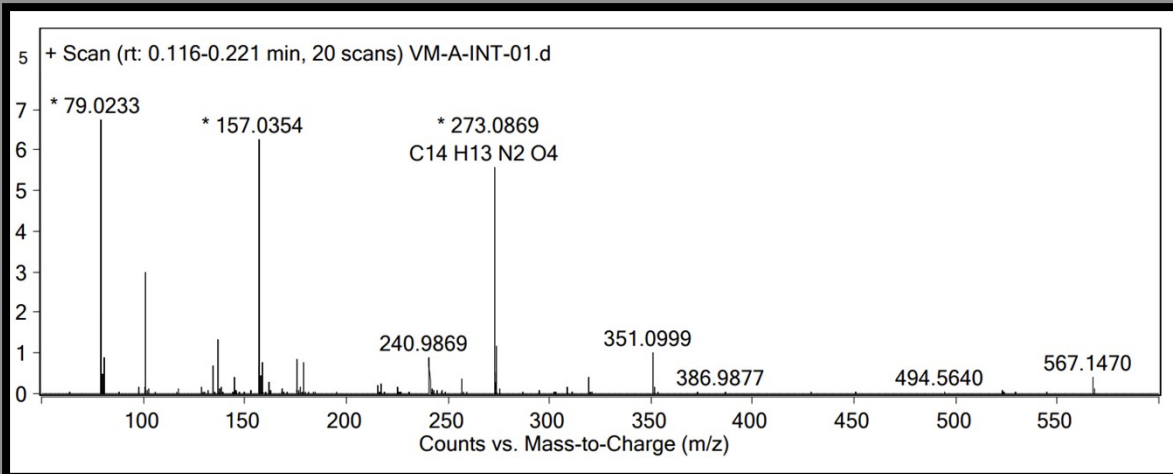

**HRMS of compound 3**

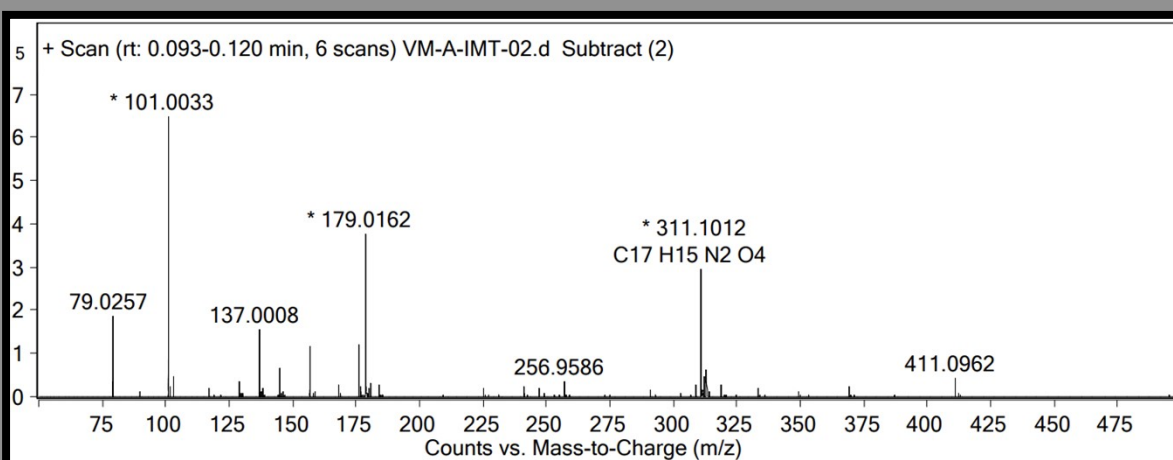

**HRMS of compound 4**

SIMPLE #3-10 RT: 0.06-0.15 AV: 4 SB: 18 0.32-1.07 NL: 4.73E5  
T: FTMS {1,2} - p APCI corona Full ms [100.00-2000.00]

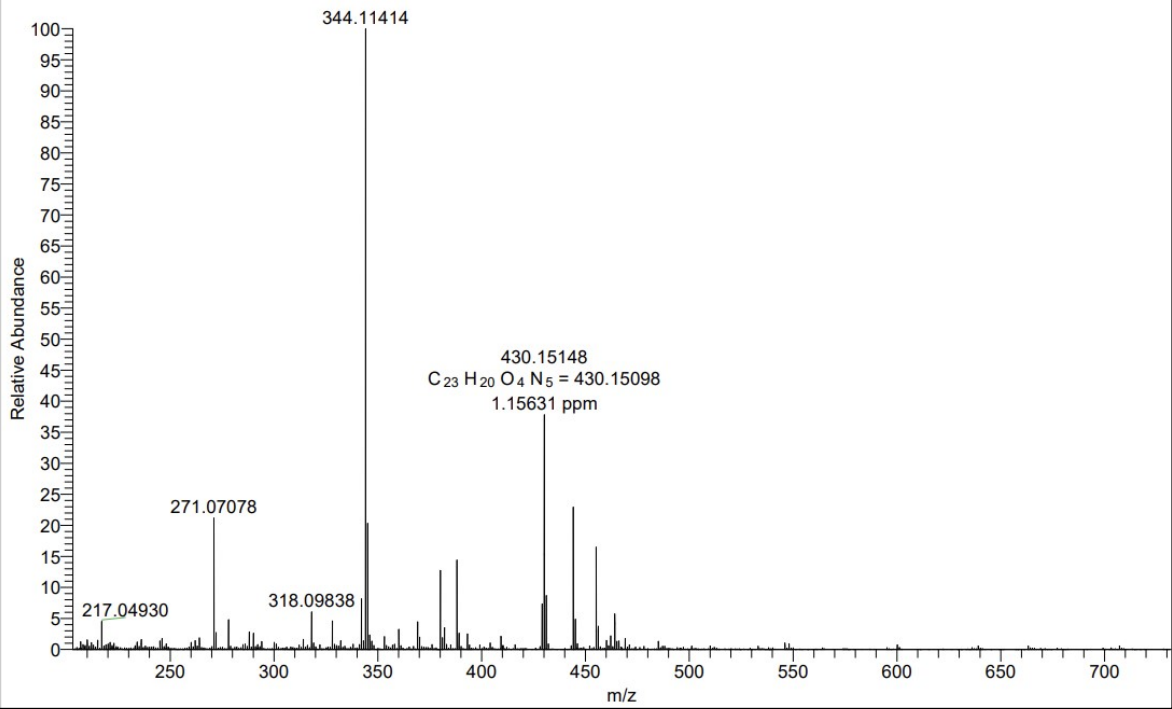

HRMS of compound 6a

P-ME #1-5 RT: 0.04-0.07 AV: 2 SB: 16 0.33-1.07 NL: 2.01E5  
T: FTMS {1,2} - p APCI corona Full ms [100.00-2000.00]

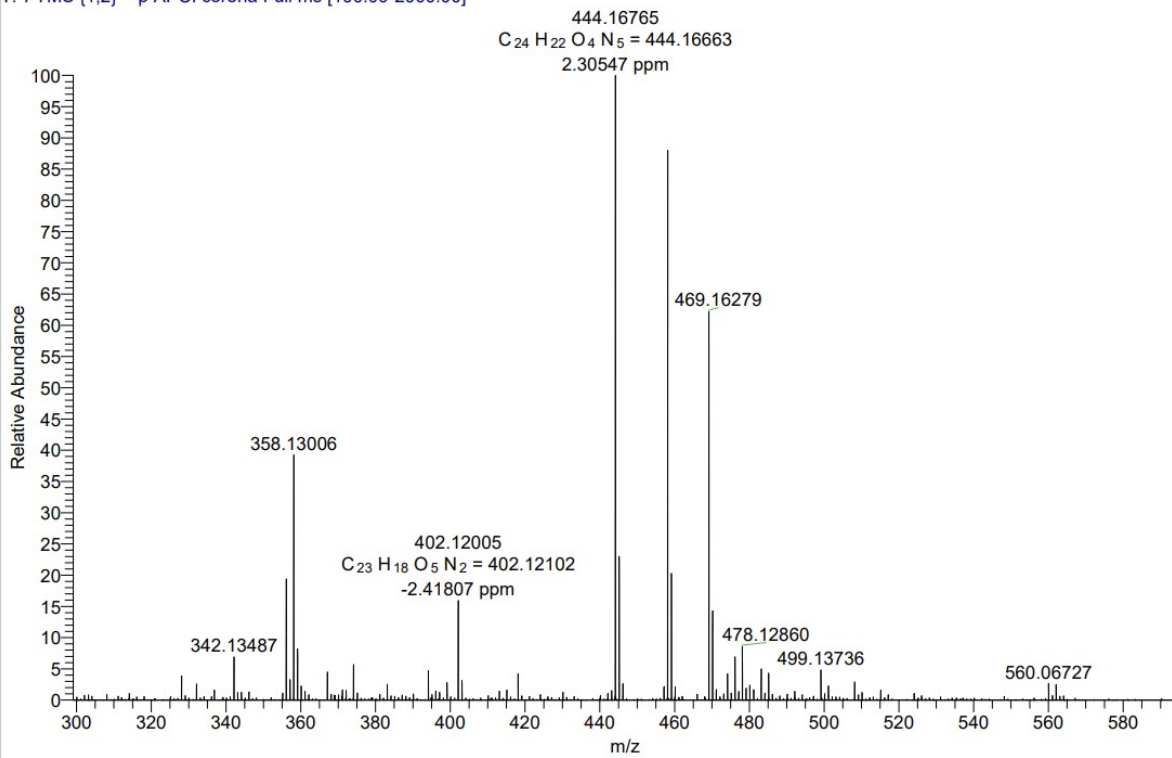

HRMS of compound 6b

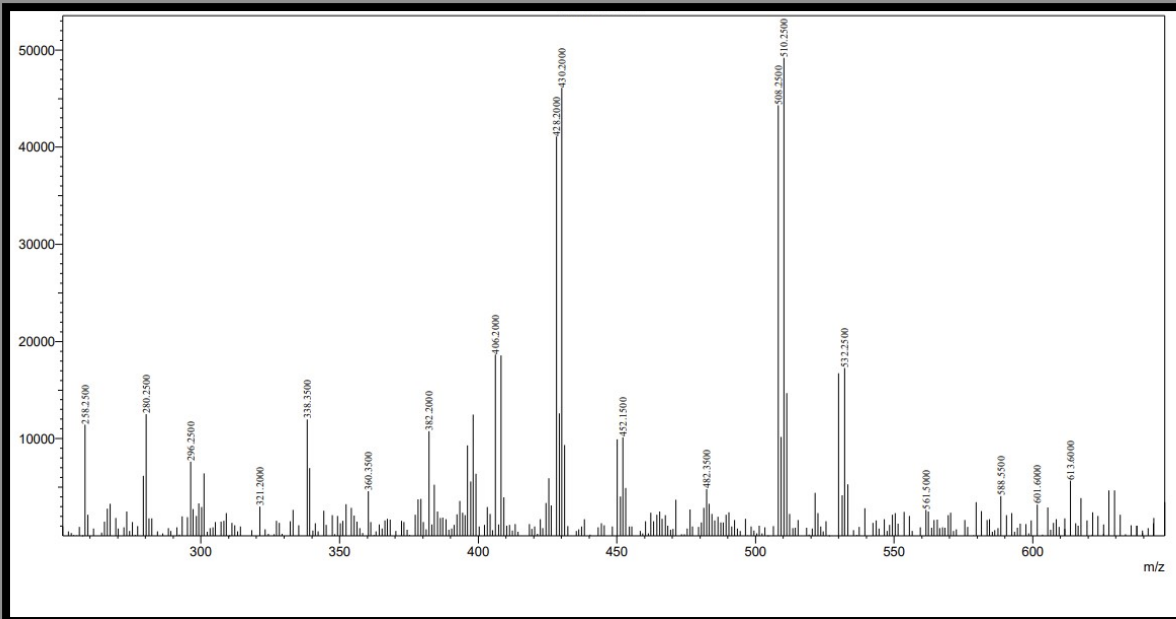

ESI Mass of 6c

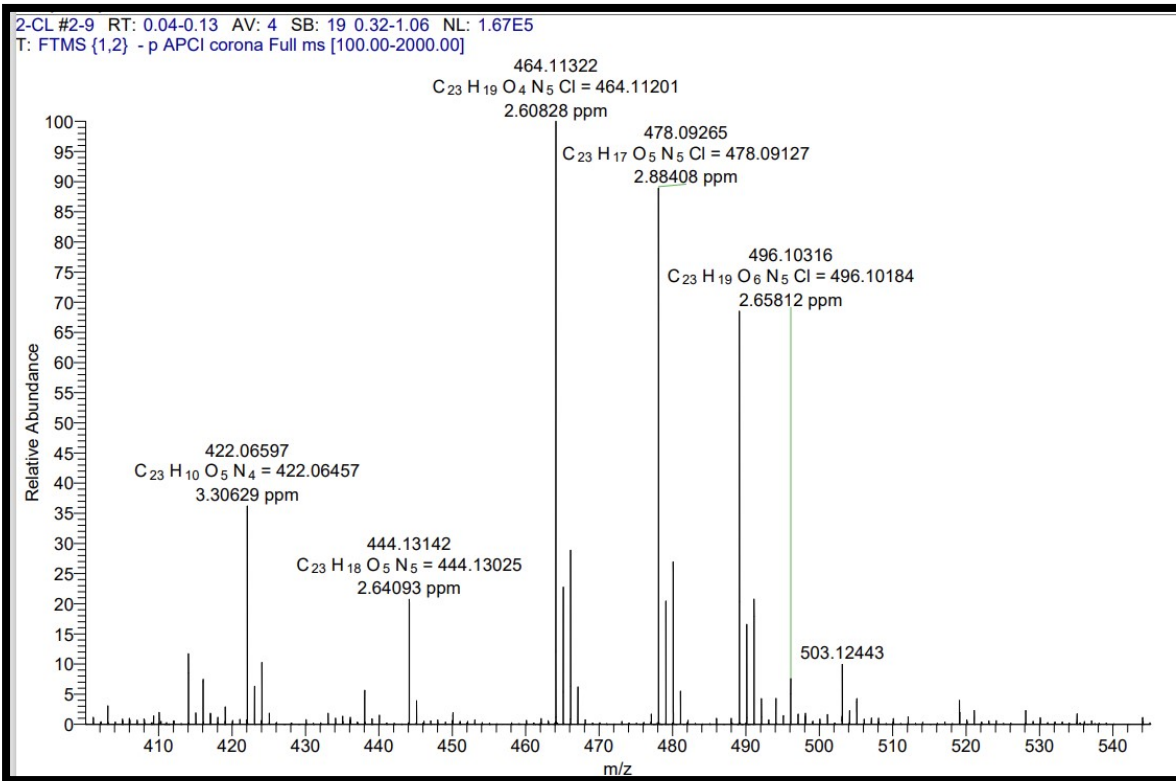

HRMS of compound 6d

3-CL #1-9 RT: 0.03-0.11 AV: 4 SB: 19 0.32-1.08 NL: 1.61E6  
T: FTMS {1,2} - p APCI corona Full ms [100.00-2000.00]

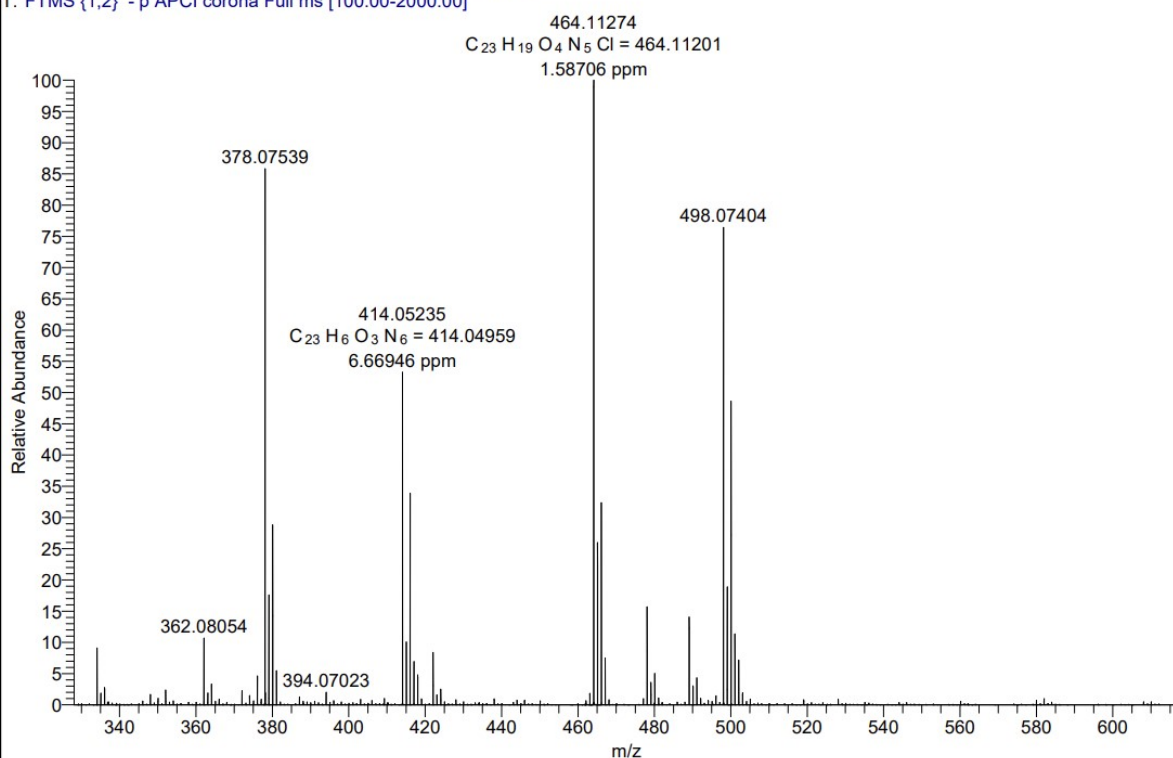

HRMS of compound 6e

P-CL #1-6 RT: 0.03-0.08 AV: 3 SB: 21 0.32-1.04 NL: 3.79E6  
T: FTMS {1,2} - p APCI corona Full ms [100.00-2000.00]

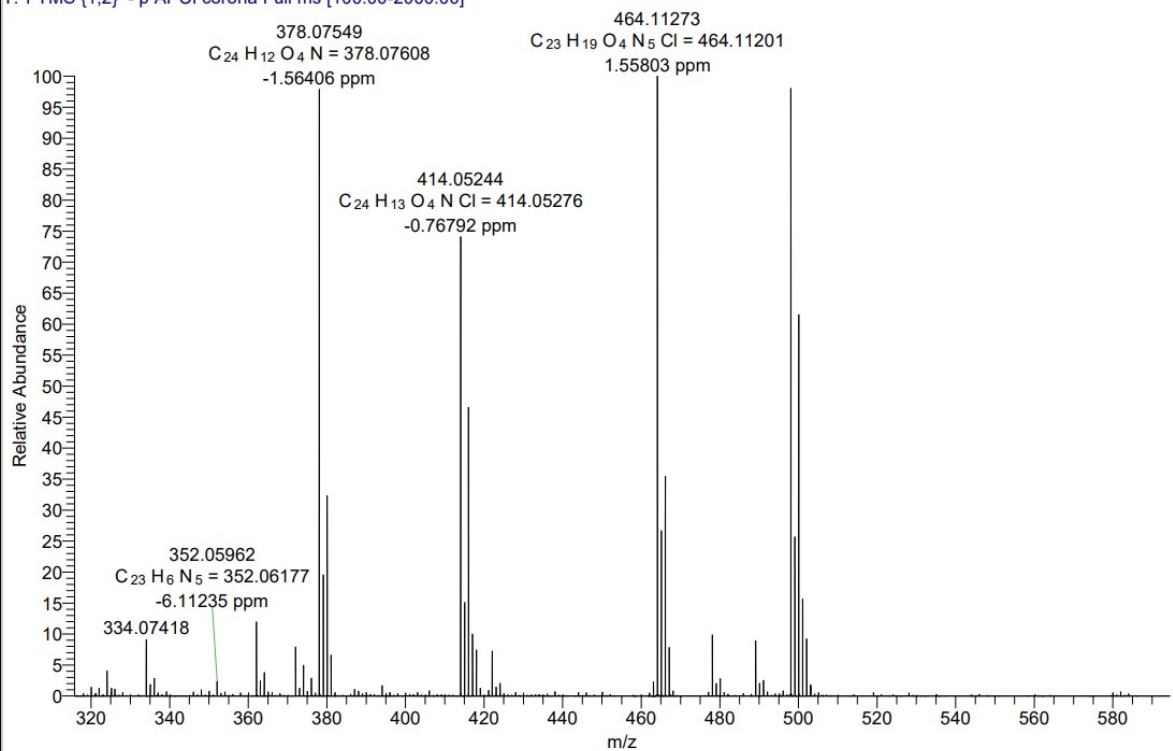

HRMS of compound 6f

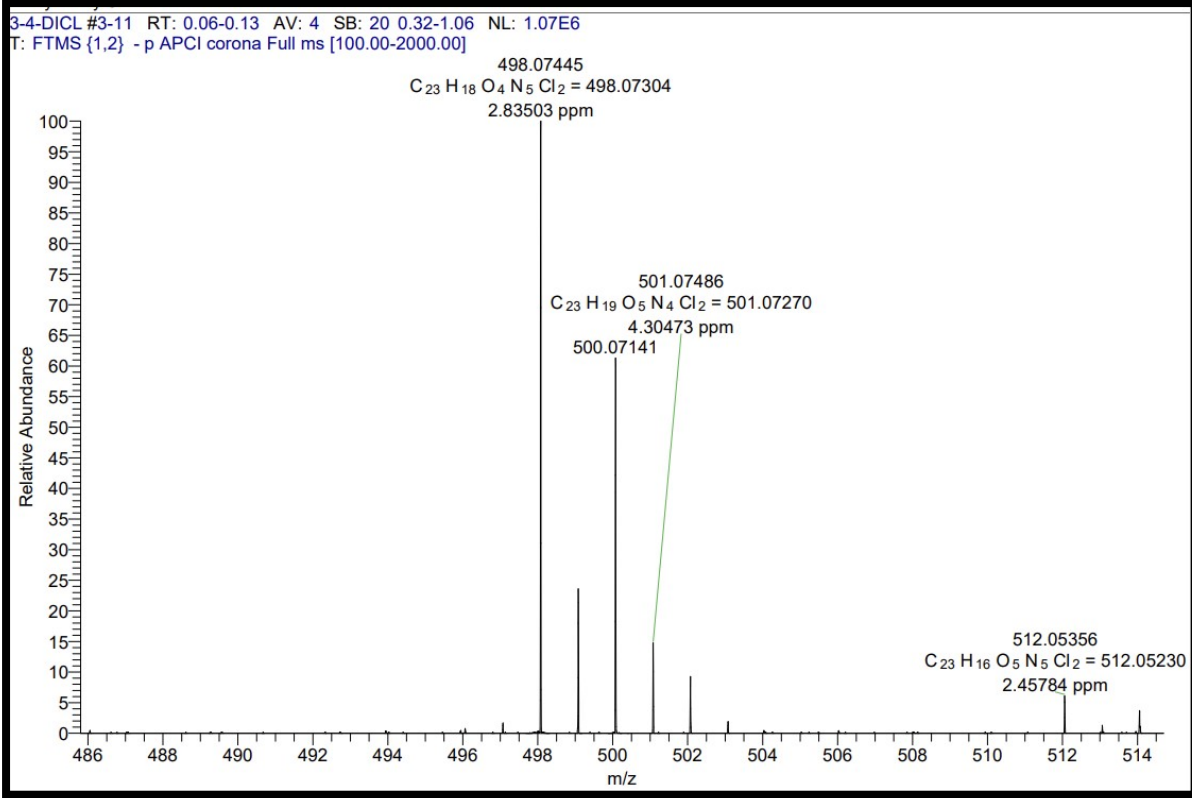

HRMS of compound 6g

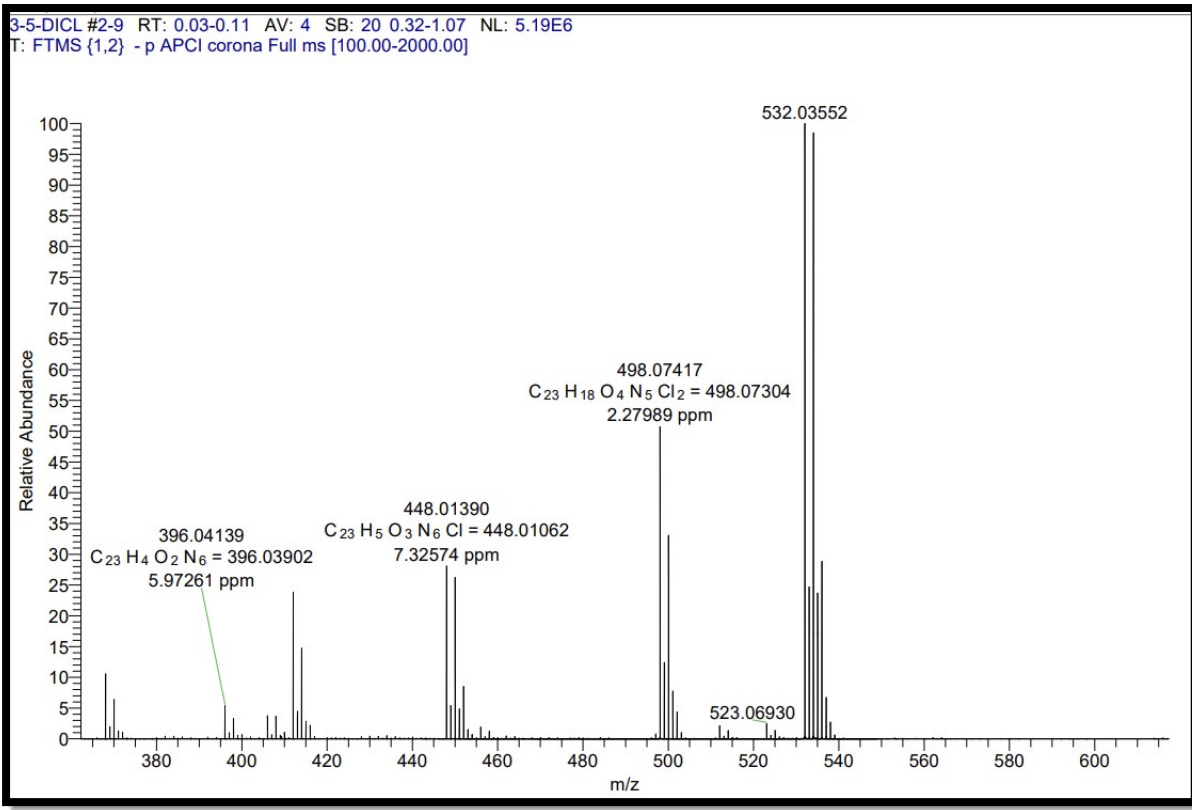

HRMS of compound 6h

4-F #1-8 RT: 0.04-0.12 AV: 4 SB: 20 0.32-1.08 NL: 1.38E6  
T: FTMS {1,2} - p APCI corona Full ms [100.00-2000.00]

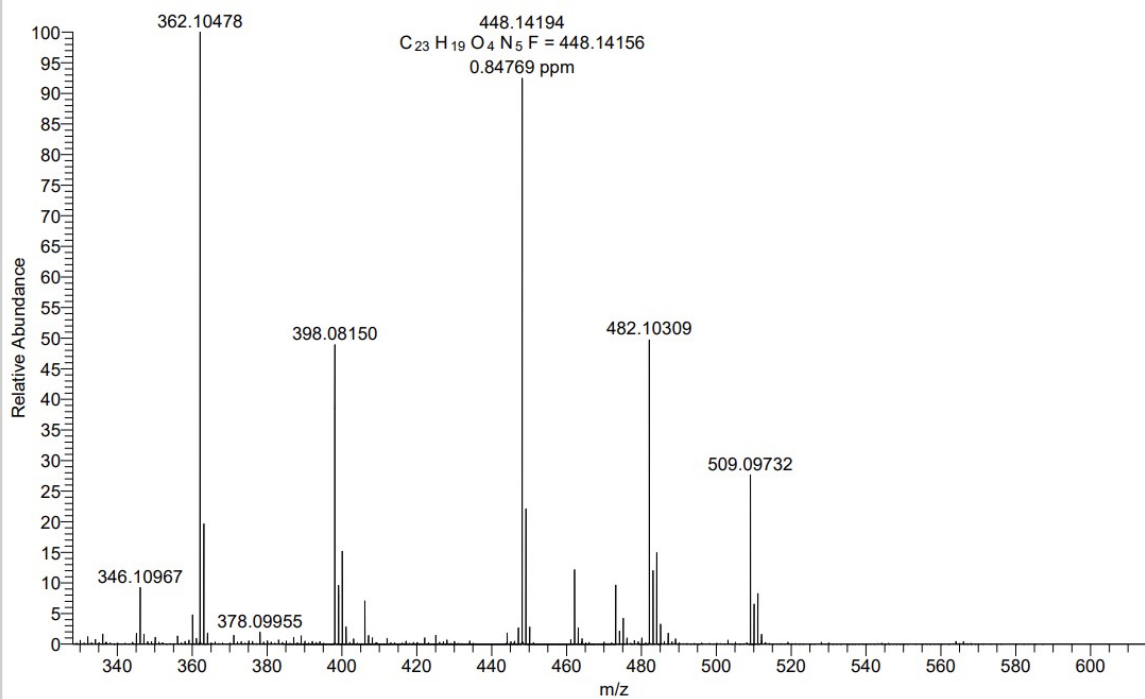

HRMS of compound 6i

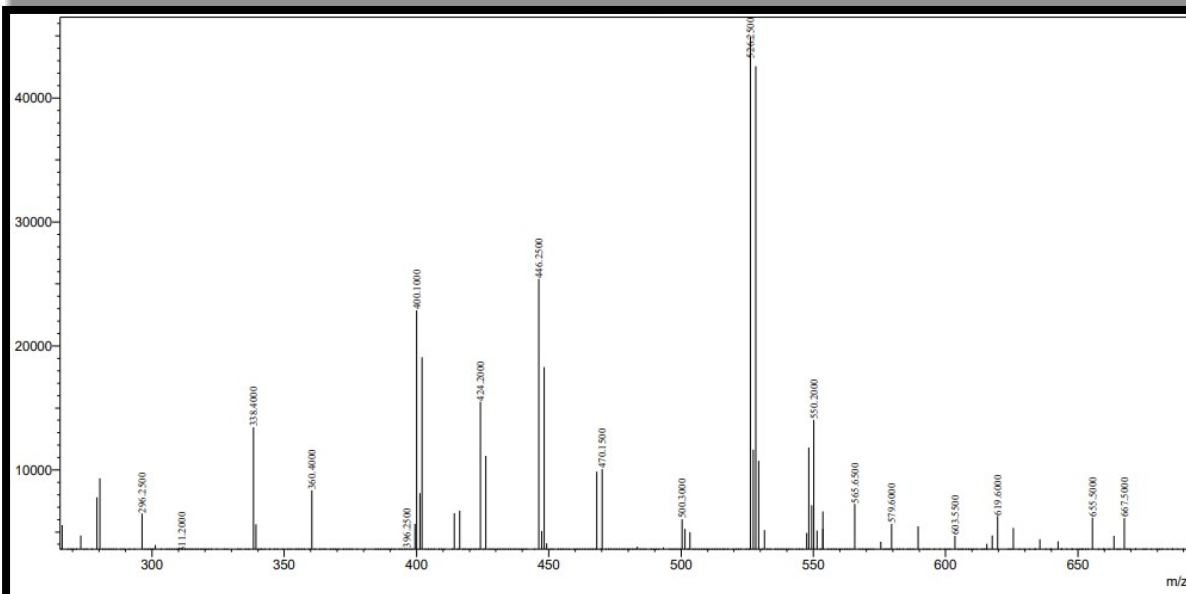

ESI Mass of 6j



P-I #2-8 RT: 0.03-0.11 AV: 4 SB: 18 0.33-1.04 NL: 2.51E6  
T: FTMS {1,2} - p APCI corona Full ms [100.00-2000.00]

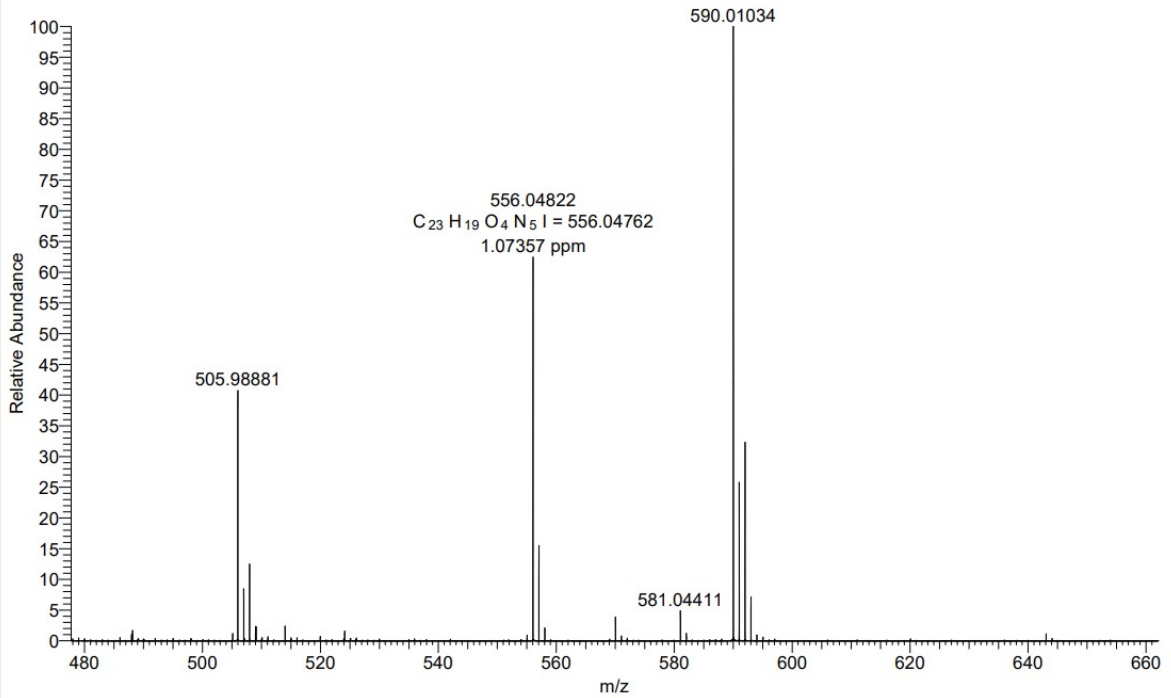

HRMS of compound 6k

P-OME #2-6 RT: 0.03-0.09 AV: 3 SB: 17 0.33-1.07 NL: 3.48E5  
T: FTMS {1,2} - p APCI corona Full ms [100.00-2000.00]

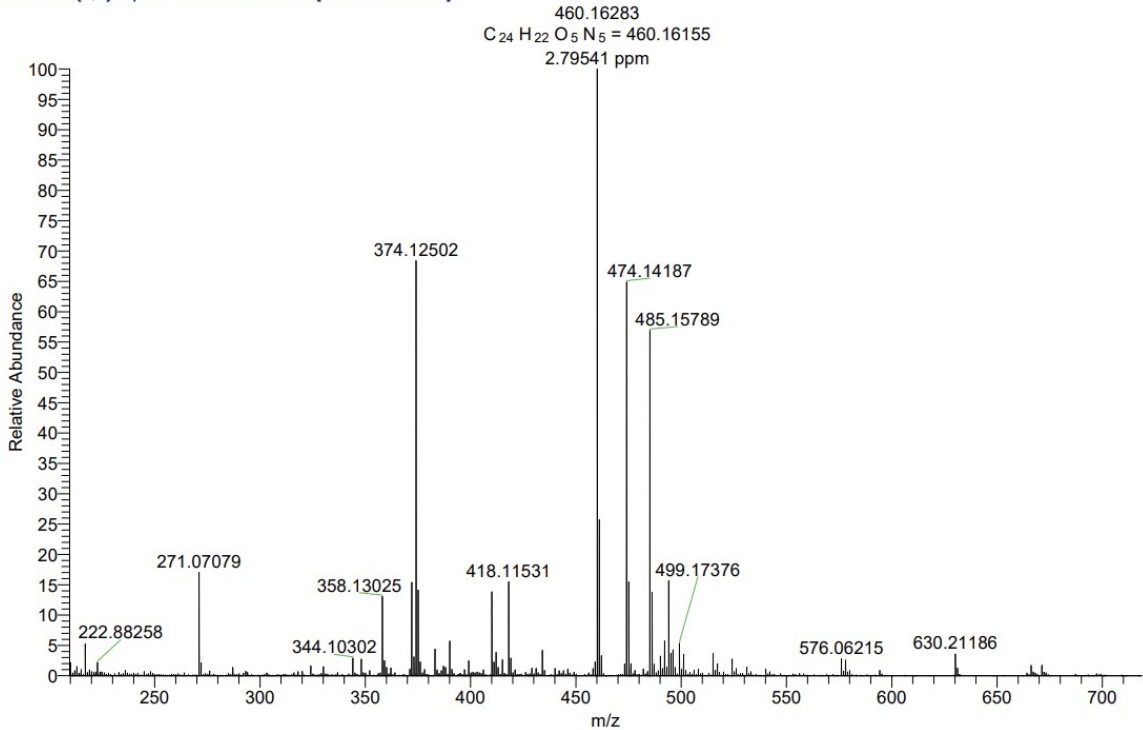

HRMS of compound 6l

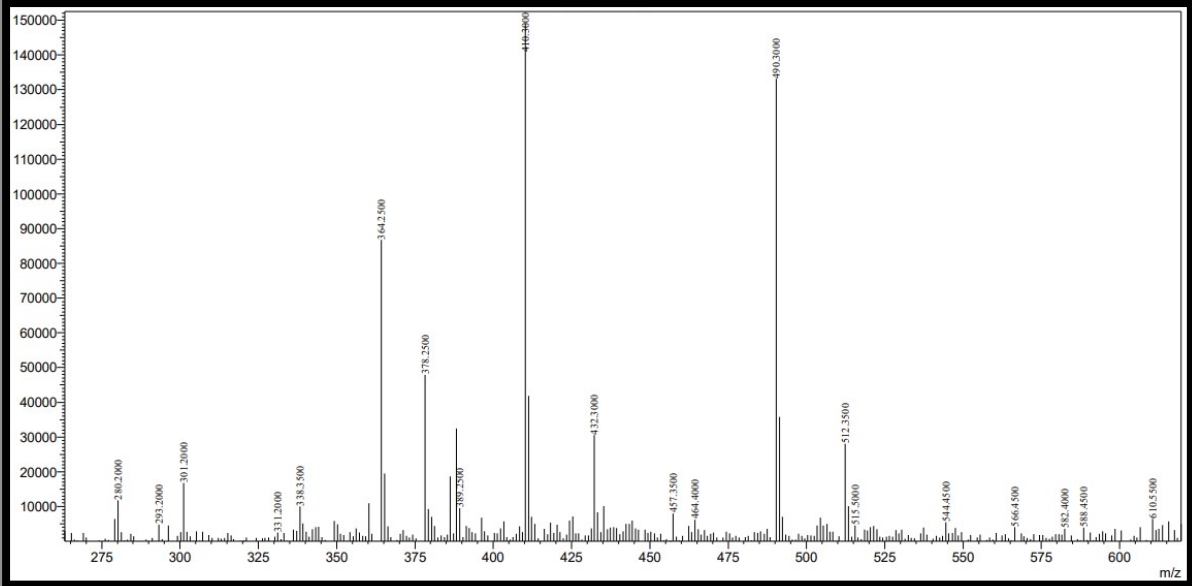

ESI Mass of 6m

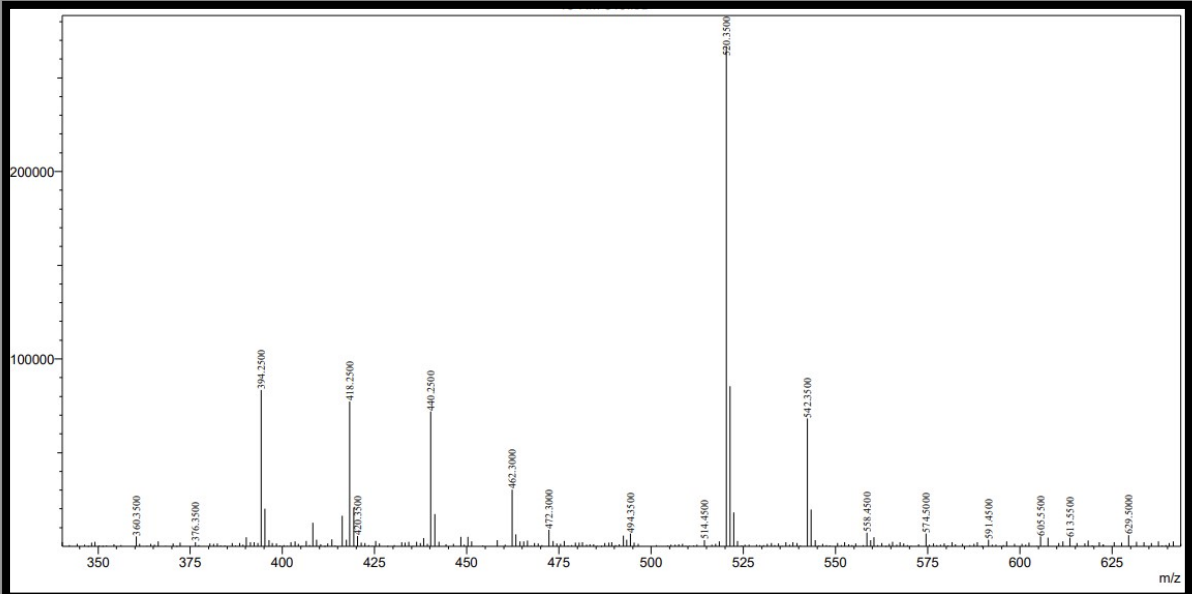

ESI Mass of 6n

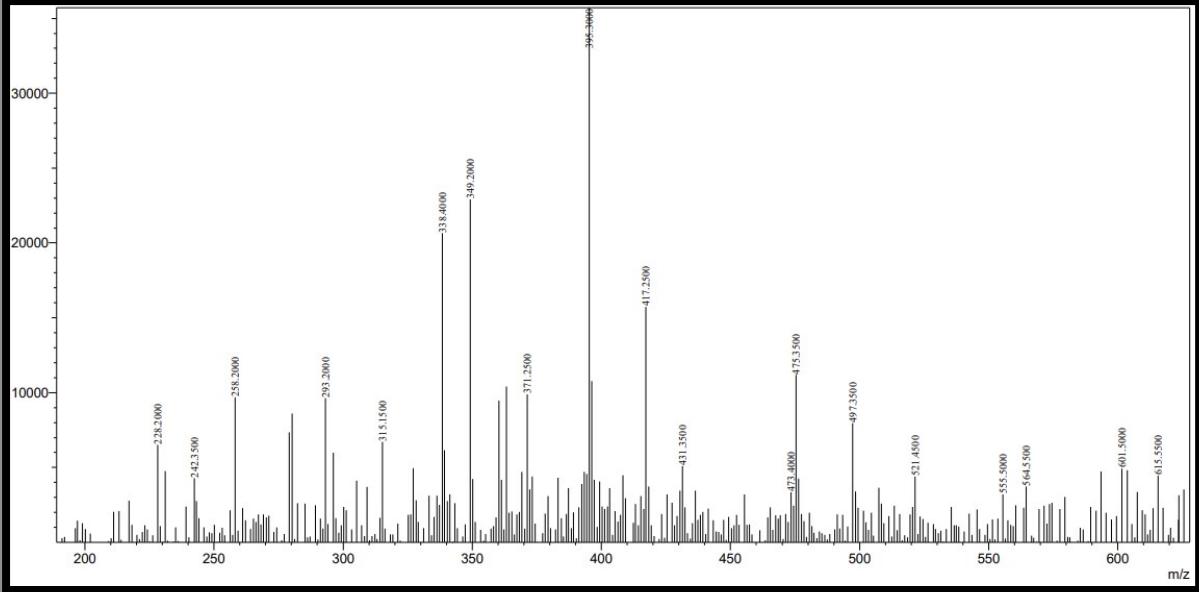

ESI Mass of 6o
